# Supplementary material for: A molecular beam and computational study on the barrierless gas phase formation of (iso)quinoline in low temperature extraterrestrial environments
Source: Royal Society of Chemistry journal article supplement (doi:10.1039/d1cp02169a), 2021-01-01
Supplement: d1cp02169a1.pdf [file d1cp02169a1.pdf]

## Electronic Supplementary Information (ESI)

### A Molecular Beams and Computational Study on the Barrierless Gas Phase Formation of (Iso)Quinoline in Low Temperature Extraterrestrial Environments

Long Zhao, Matthew Prendergast, Ralf. I. Kaiser\*

*Department of Chemistry, University of Hawaii at Manoa, Honolulu, HI 96822, USA*

Bo Xu, Wenchao Lu, Musahid Ahmed\*

*Chemical Sciences Division, Lawrence Berkeley National Laboratory, Berkeley, CA 94720, USA*

A. Hasan Howlader, Stanislaw F. Wnuk\*

*Department of Chemistry and Biochemistry, Florida International University, Miami, FL 33199,  
USA*

Alexander S. Korotchenko, Mikhail M. Evseev, Eugene K. Bashkirov

*Samara National Research University, Samara 443086, Russian Federation*

Valeriy N. Azyazov

*Lebedev Physical Institute, Samara 443011*

*and Samara National Research University, Samara 443086, Russian Federation*

Alexander M. Mebel\*

*Department of Chemistry and Biochemistry, Florida International University, Miami, FL 33199,  
USA*

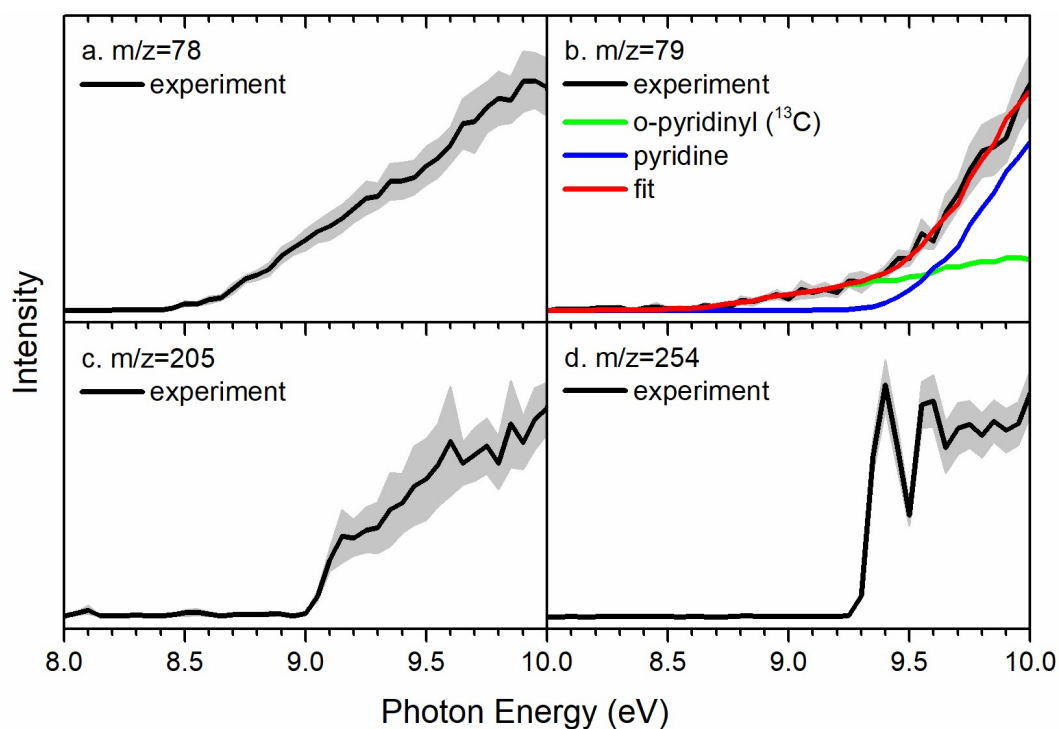

**Figure S1.** Photoionization efficiency (PIE) curves for reaction of *o*-pyridinyl ( $C_5H_4N^\bullet$ ) with vinylacetylene ( $C_4H_4$ ). Black: experimentally derived PIE curves; colored lines (green and blue): reference PIE curves; red lines: overall fit. The overall error bars consist of two parts:  $\pm 10\%$  based on the accuracy of the photodiode and a  $1 \sigma$  error of the PIE curve averaged over the individual scans.

$m/z = 78$  is related to the *o*-pyridinyl radical generated from the pyrolysis of *o*-iodopyridine ( $m/z = 205$ ). The product at  $m/z = 79$  is pyridine yielded from the H-addition to *o*-pyridinyl. The recombination of two iodine atoms leads to the signal at  $m/z = 254$ .

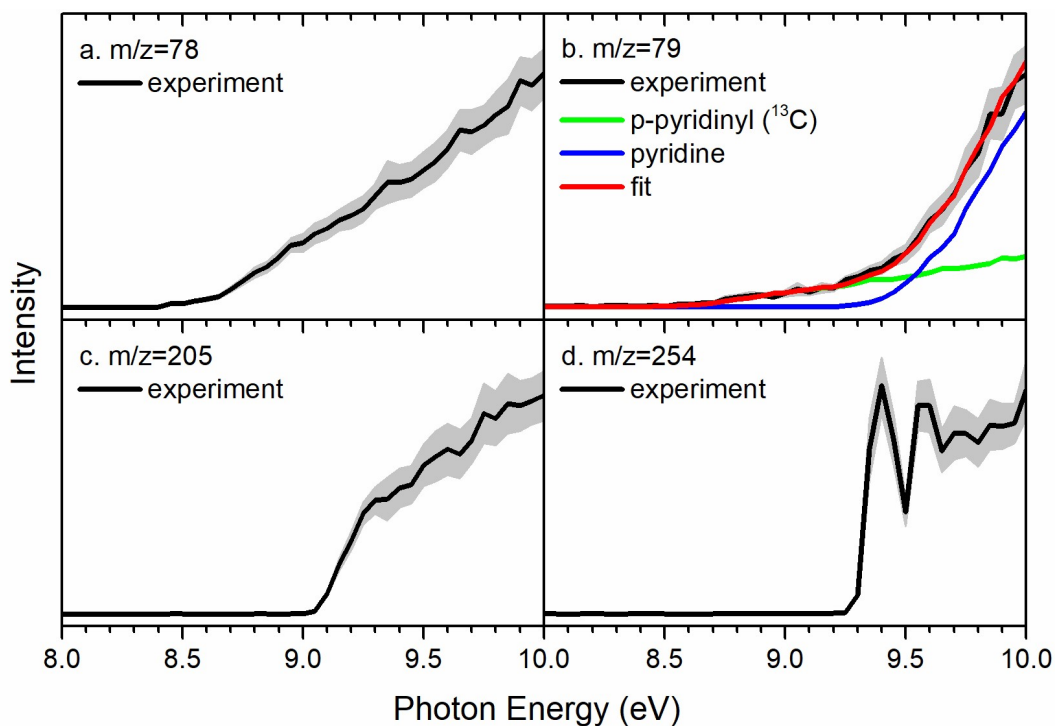

**Figure S2.** Photoionization efficiency (PIE) curves for reaction *m*-pyridinyl ( $C_5H_4N^\bullet$ ) plus vinylacetylene ( $C_4H_4$ ). Black: experimentally derived PIE curves; colored lines (green and blue): reference PIE curves; red lines: overall fit. The overall error bars consist of two parts:  $\pm 10\%$  based on the accuracy of the photodiode and a  $1 \sigma$  error of the PIE curve averaged over the individual scans.

Signal of  $m/z = 78$  is related to the *m*-pyridinyl radical generated from the pyrolysis of *m*-iodopyridine ( $m/z = 205$ ). The product at  $m/z = 79$  is pyridine formed from the H-addition to *m*-pyridinyl. The recombination of two iodine atoms leads to the signal at  $m/z = 254$ .

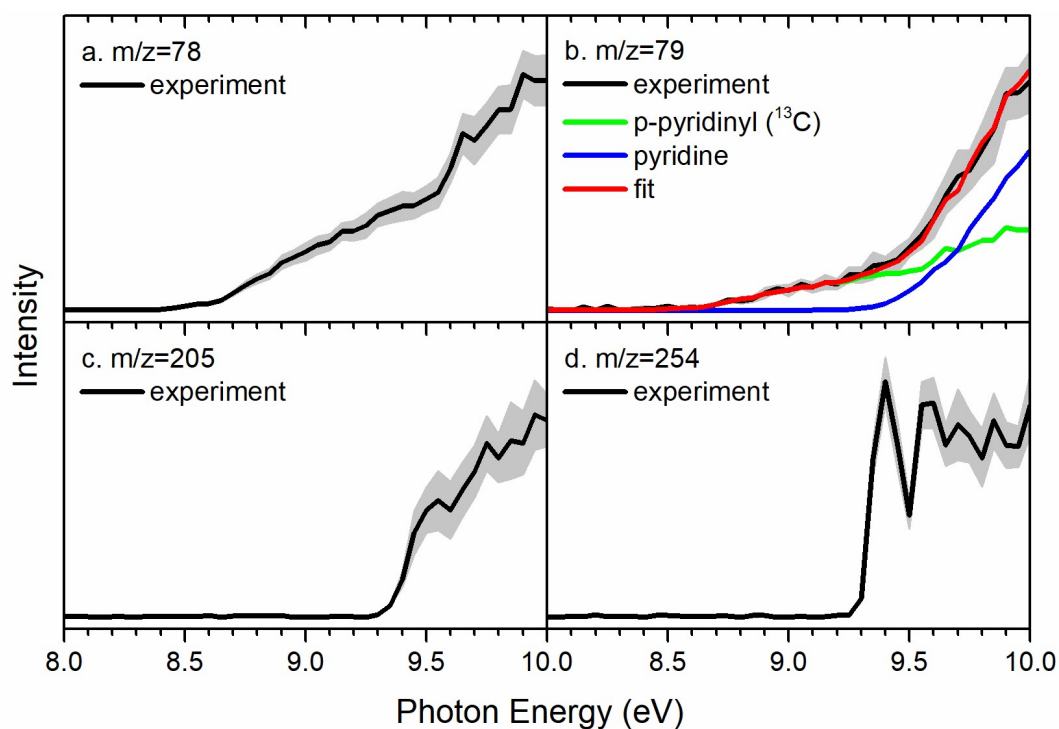

**Figure S3.** Photoionization efficiency (PIE) curves for reaction *p*-pyridinyl ( $C_5H_4N^\bullet$ ) + vinylacetylene ( $C_4H_4$ ). Black: experimentally derived PIE curves; colored lines (green and blue): reference PIE curves; red lines: overall fit. The overall error bars consist of two parts:  $\pm 10\%$  based on the accuracy of the photodiode and a  $1 \sigma$  error of the PIE curve averaged over the individual scans.

Signal of  $m/z = 78$  is related to the *p*-pyridinyl radical generated from the pyrolysis of *p*-iodopyridine ( $m/z = 205$ ). Signal at  $m/z = 79$  is pyridine formed from the H-addition to *p*-pyridinyl. The recombination of two iodine atoms leads to the signal at  $m/z = 254$ .

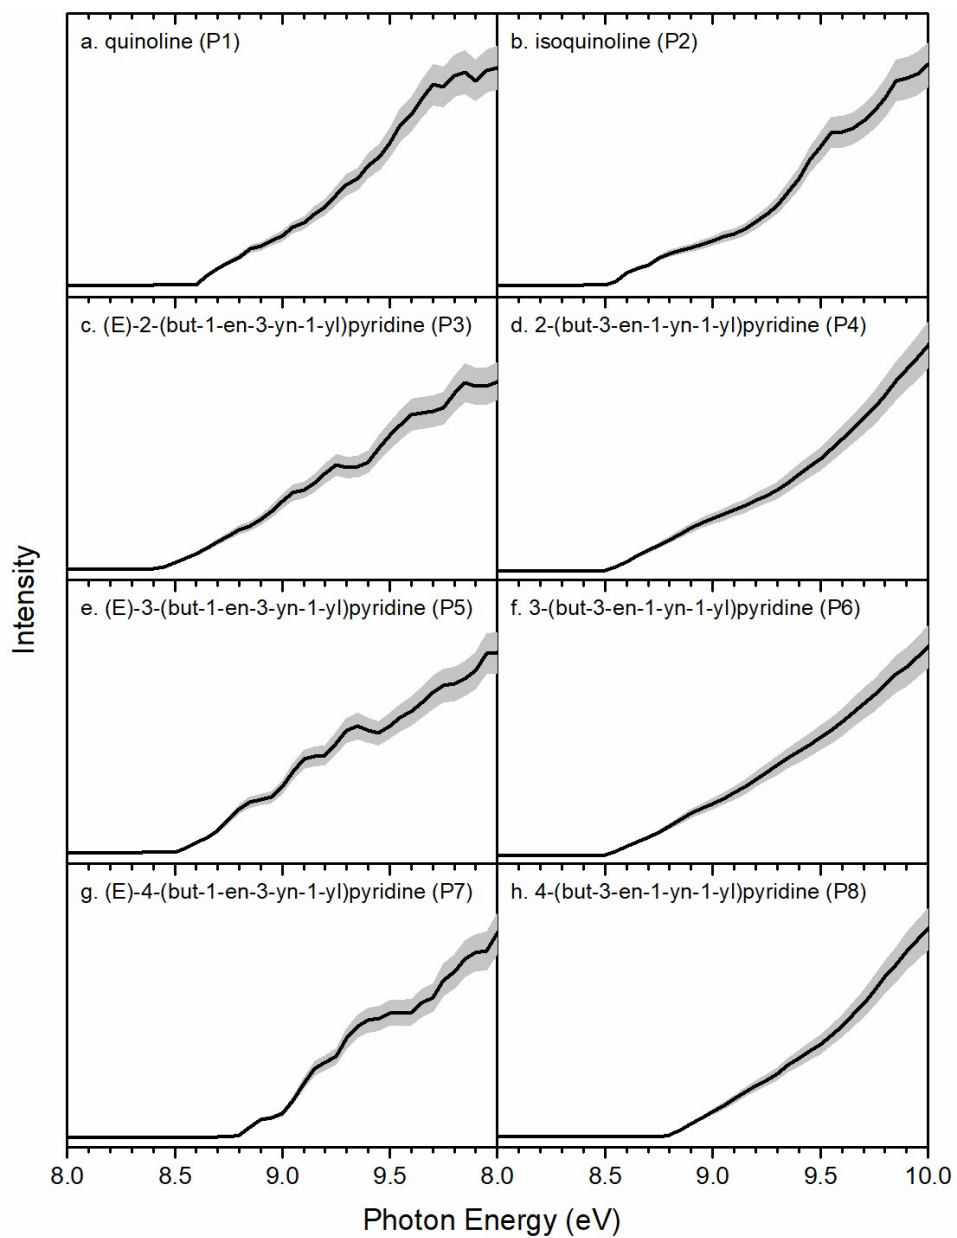

**Figure S4.** Reference PIE curves collected in this work for distinct  $C_9H_7N$  isomers.

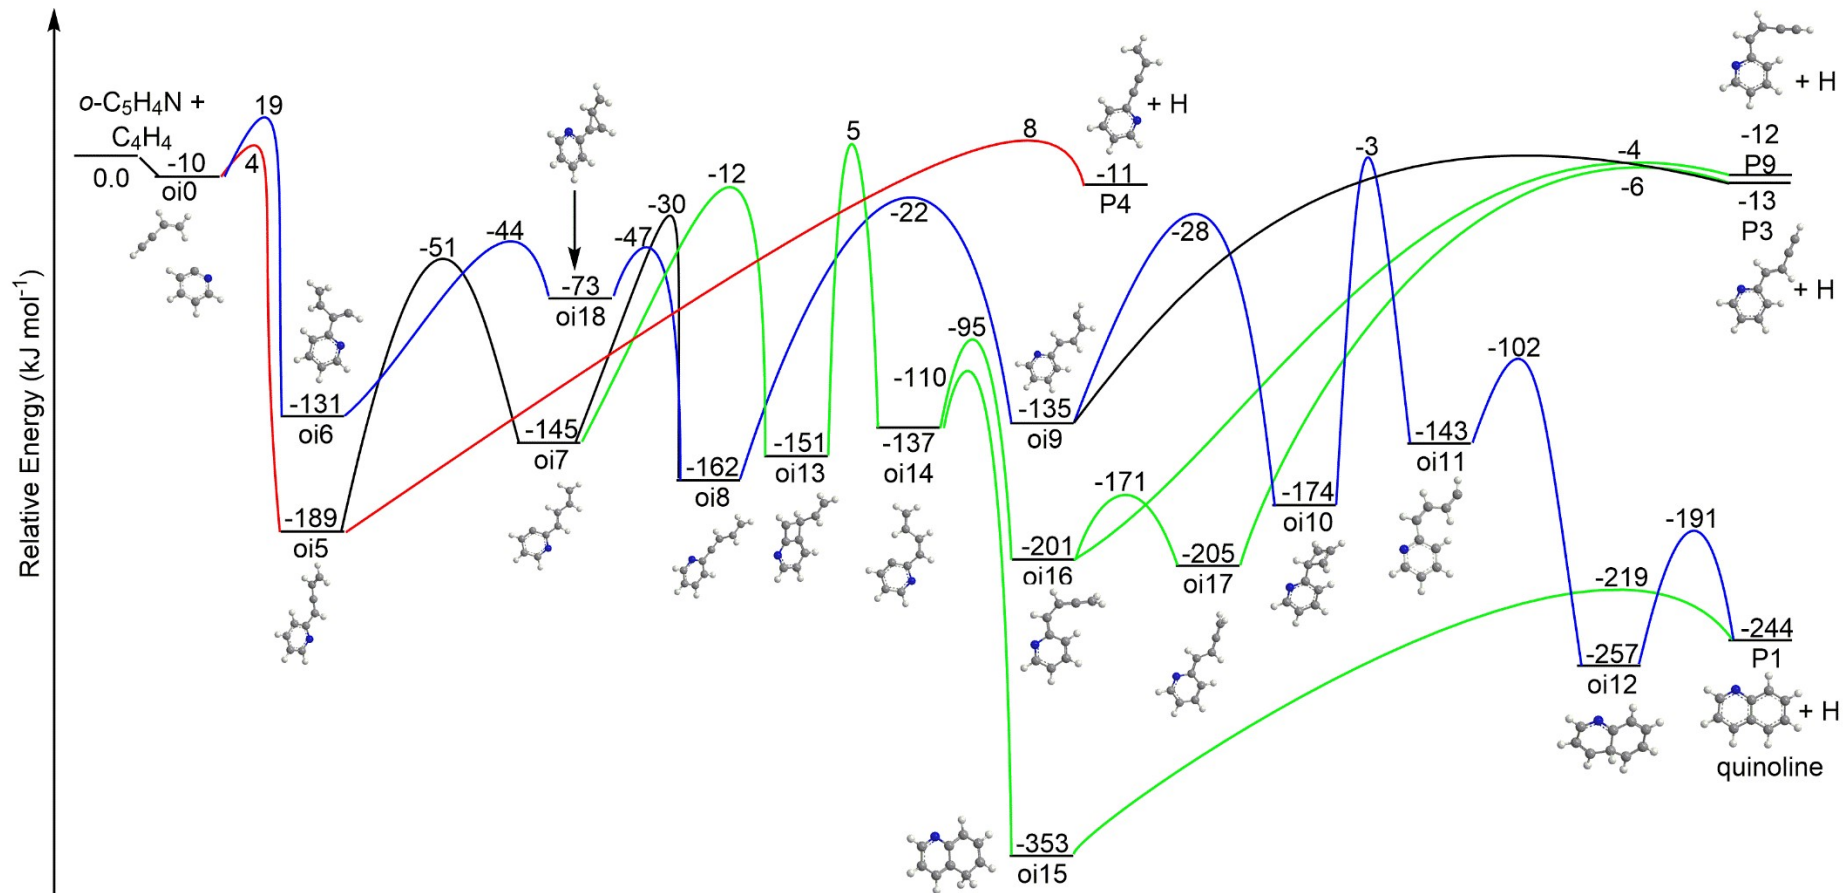

Figure S5a. Computed potential energy surface (PES) for the reaction system of *o*-pyridinyl ( $C_5H_4N$ ) and vinylacetylene ( $C_4H_4$ ). The energies calculated at the G3(MP2,CC)//B3LYP/6-311G(d,p) + ZPE level of theory are presented in units of  $\text{kJ mol}^{-1}$ . Only pathways initiated by vinylacetylene addition to the radical site by its  $C_2H$  end are shown.

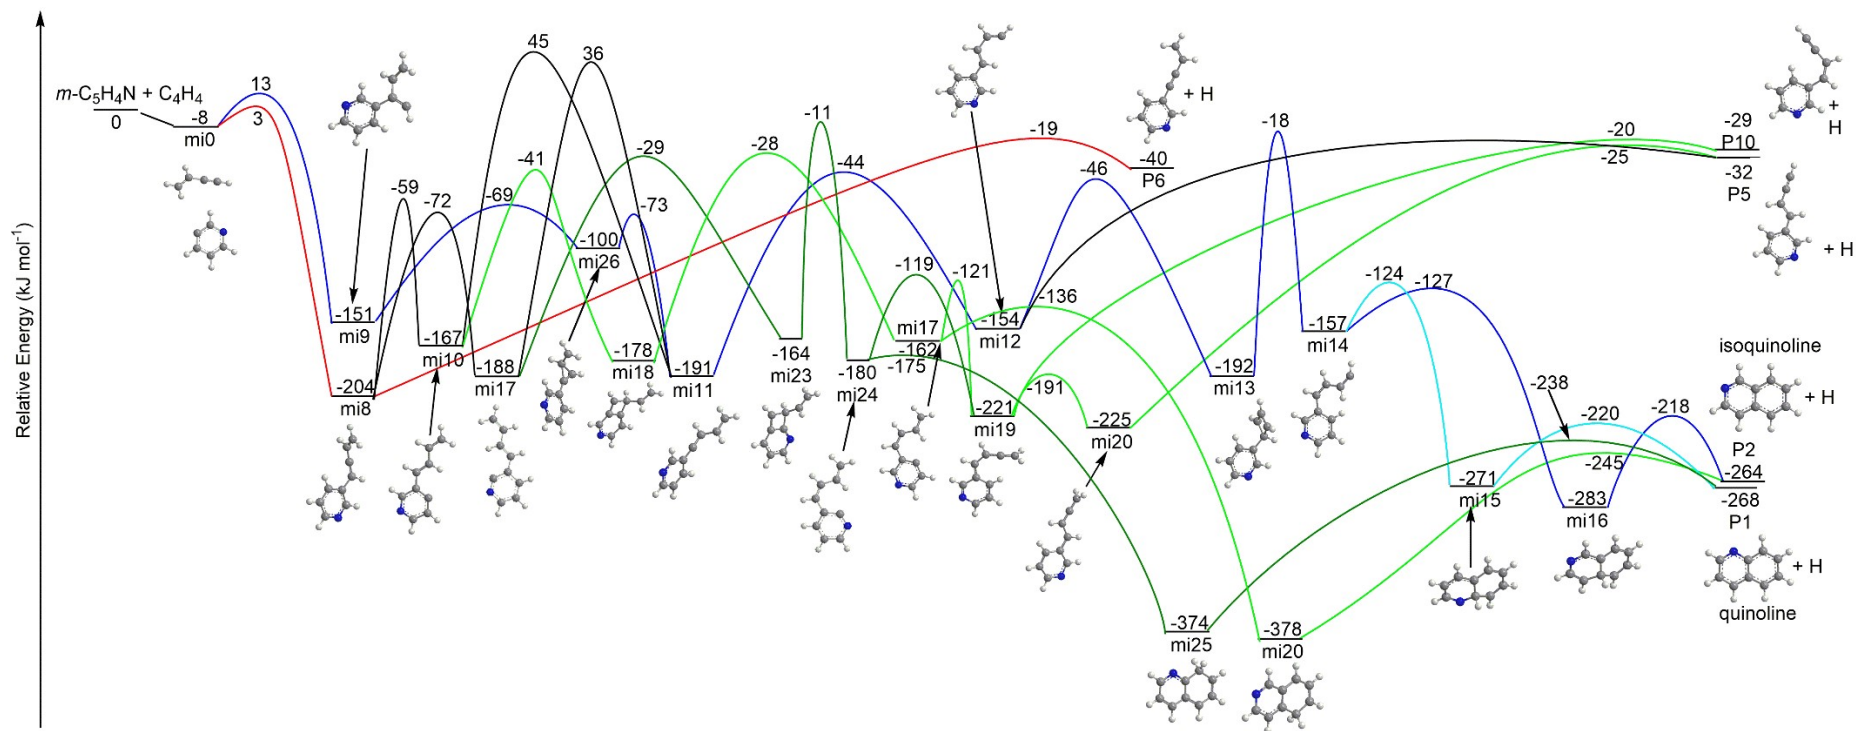

Figure S5b. Computed potential energy surface (PES) for the reaction system of *m*-pyridinyl ( $C_5H_4N$ ) and vinylacetylene ( $C_4H_4$ ). The energies calculated at the G3(MP2,CC)//B3LYP/6-311G(d,p) + ZPE level of theory are presented in units of  $\text{kJ mol}^{-1}$ . Only pathways initiated by vinylacetylene addition to the radical site by its  $C_2H$  end are shown.

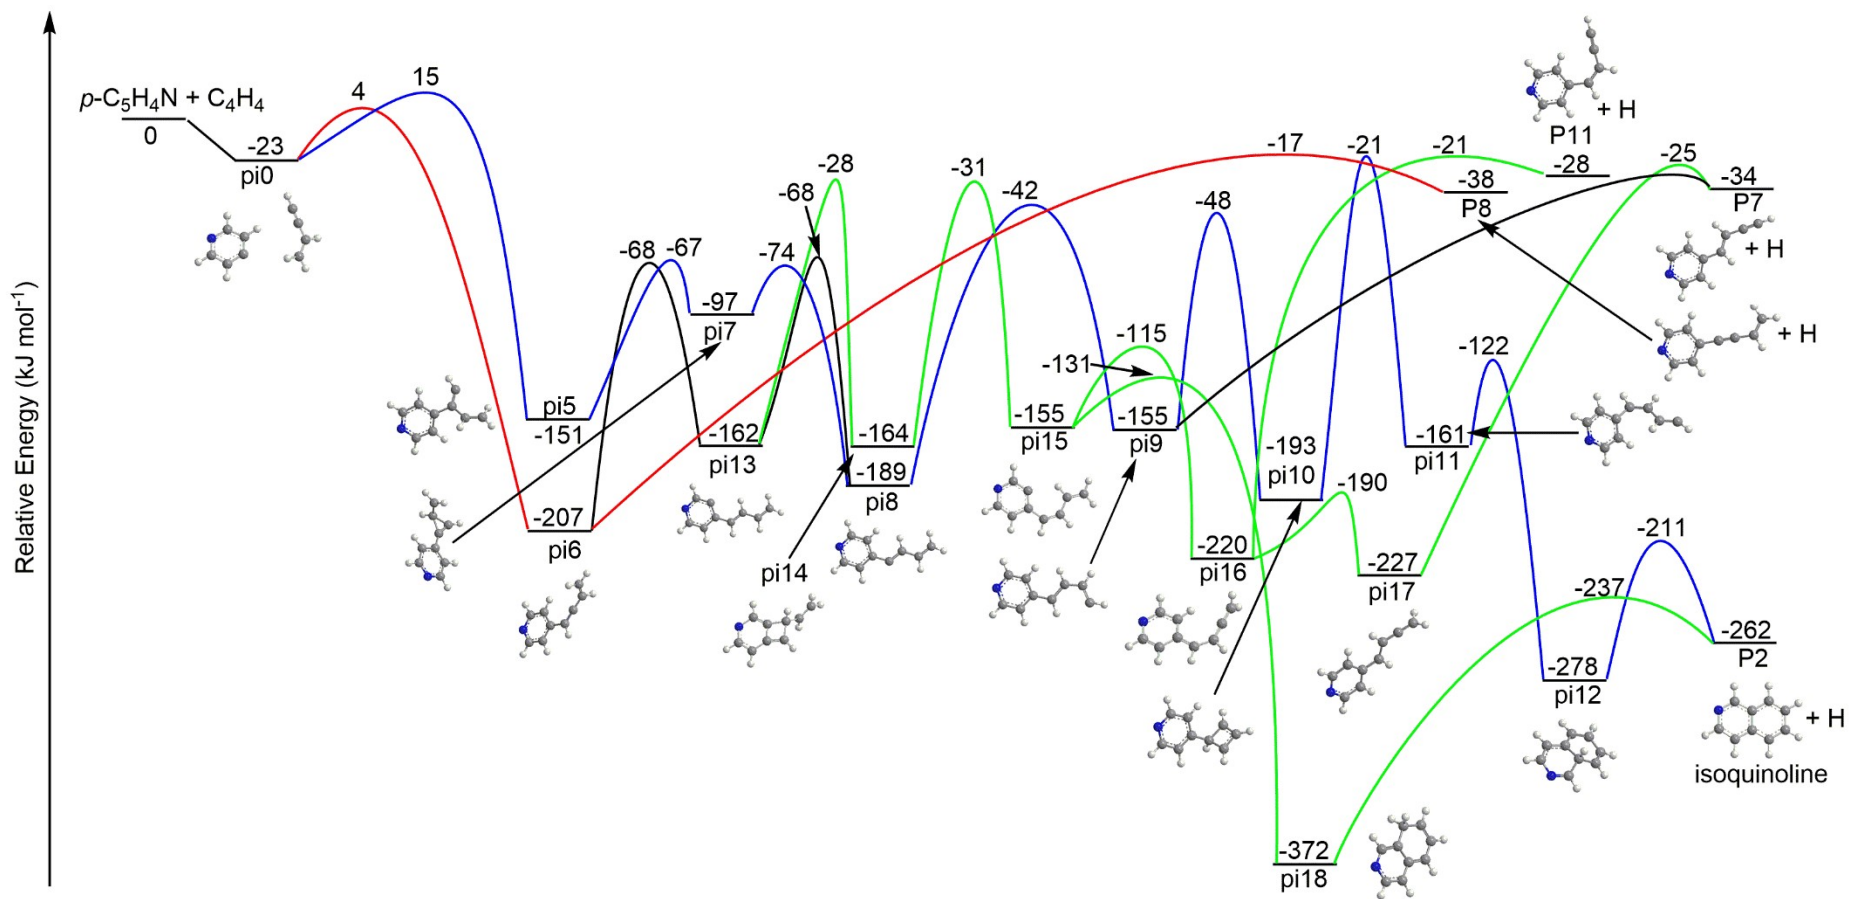

Figure S5c. Computed potential energy surface (PES) for the reaction system of *p*-pyridinyl ( $C_5H_4N$ ) and vinylacetylene ( $C_4H_4$ ). The energies calculated at the G3(MP2,CC)//B3LYP/6-311G(d,p) + ZPE level of theory are presented in units of  $\text{kJ mol}^{-1}$ . Only pathways initiated by vinylacetylene addition to the radical site by its  $C_2H$  end are shown.



## Synthesis of "enyne" and "ynene" isomers of pyridine

The enyne isomers of pyridine **P4**, **P6**, and **P8** were synthesized by CuI/Pd(PPh<sub>3</sub>)<sub>4</sub>-mediated Sonogashira coupling between *o*-ethynylpyridine **A1**, *m*-ethynylpyridine **A2**, *p*-ethynylpyridine **A3** and vinyl bromide in presence of Et<sub>2</sub>NH in THF respectively (**Scheme 1**).

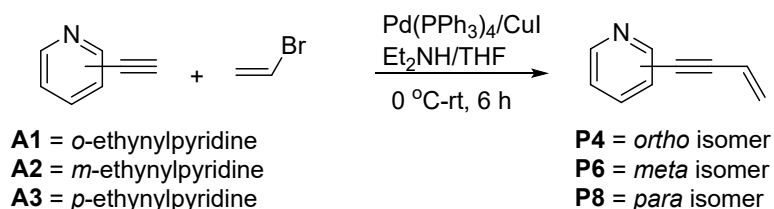

**Scheme 1.** Synthesis of *ortho*, *meta*, and *para* enyne isomers of pyridine.

The ynene isomers of pyridine **P3**, **P5**, and **P7** were synthesized by Pd-catalyzed Stille cross coupling reaction between *ortho*, *meta*, and *para* isomers of bromopyridine (e.g., **B1**) and *trans*-1,2-Bis(tri-*n*-butylstannyl)ethylene yielded *trans*-vinylstannane (e.g., **C1**) which were converted to *trans*-1-alkenyl iodide (e.g., **D1**) via iodination followed by Sonogashira cross-coupling with (trimethylsilyl)acetylene and desilylation of resulting protected alkyne (e.g., **E1**) with K<sub>2</sub>CO<sub>3</sub> (**Scheme 2**) gave desired products.

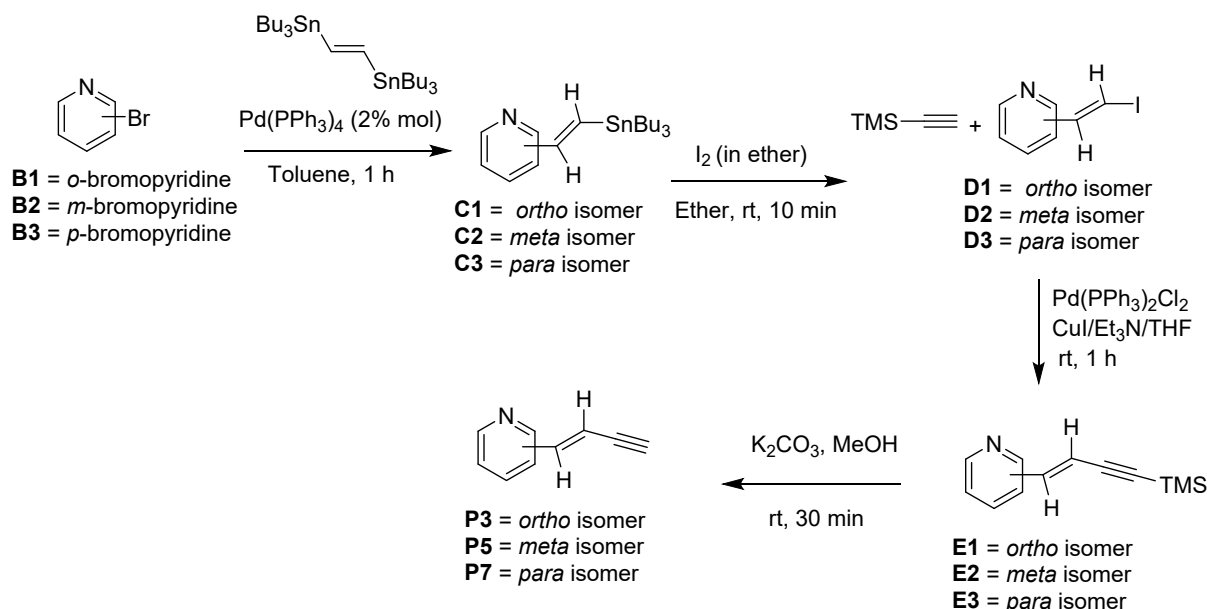

**Scheme 2.** Synthesis of *ortho*, *meta*, and *para* (*E*)-ynene isomers of pyridine analogue.

The (*Z*)-3-(but-1-en-3-yn-1-yl)pyridine **P9** was synthesized by CuI/Pd(PPh<sub>3</sub>)<sub>2</sub>Cl<sub>2</sub>-mediated Sonogashira cross-coupling of commercially available (*Z*)-3-(2-(bromovinyl)pyridine with (trimethylsilyl)acetylene and desilylation of **F** with K<sub>2</sub>CO<sub>3</sub> (**Scheme 3**).

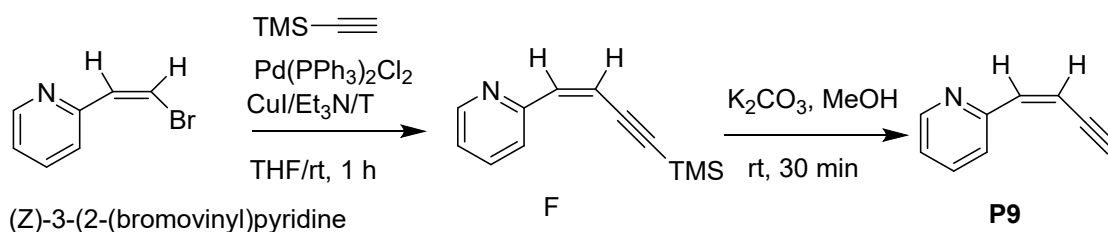

**Scheme 3.** Synthesis of (*Z*)-3-(but-1-en-3-yn-1-yl)pyridine **P9**.

**General Information.** <sup>1</sup>H NMR spectra at 400 MHz and <sup>13</sup>C NMR at 101 MHz were recorded in CDCl<sub>3</sub> unless otherwise noted. All chemical shift values are reported in parts per million (ppm) and referenced to the residual solvent peaks of CDCl<sub>3</sub> (7.26 ppm) or DMSO-*d*<sub>6</sub> (2.50 ppm) for <sup>1</sup>H NMR and CDCl<sub>3</sub> (77.16 ppm) or DMSO-*d*<sub>6</sub> (39.52 ppm) peaks for <sup>13</sup>C NMR spectra, with coupling constant (*J*) values reported in Hz. Reaction progress was monitored by TLC on Merck Kieselgel 60-F<sub>254</sub> sheets with product detection by 254-nm light. Products were purified by column chromatography using Merck Kieselgel 60 (230-400 mesh). Reagent grade chemicals and solvents were used without further purification unless otherwise specified.

### 2-(But-3-en-1-yn-1-yl)pyridine; **P4**. Procedure I

Pd(PPh<sub>3</sub>)<sub>4</sub> (34.67 mg, 0.03 mmol) and Cu(I)I (22.85 mg, 0.12 mmol) were placed in the flame-dried flask under N<sub>2</sub> at 0 °C (ice-bath). Then Et<sub>2</sub>NH (1.50 mL, 1060 mg, 14.5 mmol) and vinyl bromide (1.0 M in THF; 4.0 mL, 4.0 mmol) were added following by slow addition of commercially available 2-ethynylpyridine **A1** (310.0 mg, 3.0 mmol) dissolved in dry THF (2 mL) via a syringe pump (over 3 h). The resulting mixture was allowed to warm up to ambient temperature (30 min) and was stirred for another 2 h. Volatiles were evaporated and the residue was dissolved in EtOAc and filtered. The filtrate was collected and solvent was evaporated. The residue was column chromatographed (10-30% EtOAc in hexane) to give **P4** (300.0 mg, 77%) as a yellow liquid. <sup>1</sup>H NMR (CDCl<sub>3</sub>, 400 MHz) δ 5.64 (dd, *J* = 11.2, 2.0 Hz, 1H), 5.85 (dd, *J* = 17.6, 2.0 Hz, 1H), 6.02 (dd, *J* = 17.6, 11.2 Hz, 1H), 7.21 (43 (dd, *J* = 7.2, 5.2 Hz, 1H), 7.43 (d, *J* = 8.0 Hz, 1H), 7.64 (td, *J* = 7.6, 1.6 Hz, 1H), 8.58

(d,  $J = 3.2$  Hz, 1H);  $^{13}\text{C}$  NMR ( $\text{CDCl}_3$ , 100.6 MHz)  $\delta$  88.07, 89.14, 116.65, 122.86, 127.11, 129.05, 136.36, 143.45, 150.02.

### **3-(But-3-en-1-yn-1-yl)pyridine; P6.**

Treatment of commercially available 3-ethynylpyridine **A2** (310.0 mg, 3.0 mmol) with vinyl bromide by Procedure I (column chromatography; EtOAc in hexane 10-30%) gave **P6** (270.0 mg, 70%) as a yellow liquid.  $^1\text{H}$  NMR ( $\text{DMSO-}d_6$ , 400 MHz)  $\delta$  5.72 (dd,  $J = 11.2, 2.0$  Hz, 1H), 5.82 (dd,  $J = 17.6, 2.0$  Hz, 1H), 6.17 (dd,  $J = 17.6, 11.2$  Hz, 1H), 7.43 (dd,  $J = 8.0, 4.8$  Hz, 1H), 7.89 (dt,  $J = 8.0, 1.6$  Hz, 1H), 8.57 (d,  $J = 4.0$  Hz, 1H), 8.67 (s, 1H);  $^{13}\text{C}$  NMR ( $\text{DMSO-}d_6$ , 100.6 MHz)  $\delta$  86.70, 91.24, 116.70, 119.36, 123.89, 129.05, 138.40, 149.08, 151.32.

### **4-(But-3-en-1-yn-1-yl)pyridine, P8.**

Treatment of commercially available 4-ethynylpyridine **A3** (310.0 mg, 3.0 mmol) with vinyl bromide by Procedure I (column chromatography; EtOAc in hexane 10-30%) gave **P8** (290.0 mg, 75%) as a yellow liquid.  $^1\text{H}$  NMR ( $\text{DMSO-}d_6$ , 400 MHz)  $\delta$  5.77 (dd,  $J = 11.2, 1.6$  Hz, 1H), 5.88 (dd,  $J = 17.6, 1.6$  Hz, 1H), 6.18 (dd,  $J = 17.6, 11.2$  Hz, 1H), 7.47 (s, 2H), 8.69 (brs, 2H);  $^{13}\text{C}$  NMR ( $\text{DMSO-}d_6$ , 100.6 MHz)  $\delta$  87.22, 92.41, 116.38, 116.44, 125.69, 129.94, 130.14, 130.18, 149.85.

### **(E)-2-(2-(Tributylstannyl)vinyl)pyridine; C1. Procedure II**

A flame dry round bottom flask equipped with a magnetic stirrer was charged with 2-bromopyridine **B1** (191  $\mu\text{L}$ , 316 mg, 2.0 mmol), *trans*-1,2-bis(tri-*n*-butylstannyl)ethylene (1.3 mL, 1470 mg, 2.4 mmol), dry toluene (10 mL) and  $\text{Pd}(\text{PPh}_3)_4$  (46.2 mg, 0.04 mmol) and the resulting mixture was deoxygenated with  $\text{N}_2$ . The reaction mixture was stirred at 100  $^\circ\text{C}$  (oil bath) for 1 h. The volatiles were evaporated, and the residue was column chromatographed (0-10% EtOAc in hexane) to give **C1** (633.4 mg, 80%) as a clear oil.  $^1\text{H}$  NMR ( $\text{CDCl}_3$ , 400 MHz)  $\delta$  0.90 (t,  $J = 7.6$  Hz, 9H), 0.99 (t,  $J = 8.0$  Hz, 6H), 1.35 (m, 6H), 1.54 (m, 6H), 7.02 (d,  $J = 19.6$  Hz, 1H), 7.13 (m, 1H), 7.38 (d,  $J = 8.0$  Hz, 1H), 7.39 (d,  $J = 19.6$  Hz, 1H), 7.66 (td,  $J = 7.6, 2.0$  Hz, 1H), 8.54 (d,  $J = 4.0$  Hz, 1H);  $^{13}\text{C}$  NMR ( $\text{CDCl}_3$ , 100.6 MHz)  $\delta$  9.81, 13.82, 27.46, 29.25, 120.87, 122.24, 136.27, 136.72, 145.94, 149.43, 156.18.

### **(E)-2-(2-(Iodovinyl)pyridine; D1. Procedure III**

The vinyl stannane **C1** (600 mg, 1.52 mmol) was dissolved in  $\text{Et}_2\text{O}$  (10 mL) and elemental iodine (386 mg, 1.52 mmol; dissolved in 5 mL  $\text{Et}_2\text{O}$ ) was added dropwise while stirring at room temperature. After completion of addition, the reaction mixture was stirred for another 10 min. The excess  $\text{I}_2$  was destroyed by aqueous  $\text{Na}_2\text{S}_2\text{O}_3$

solution. The reaction mixture was extracted with Et<sub>2</sub>O (30 mL x 3) and organic layer was separated. The combined organic layer was dried (Na<sub>2</sub>SO<sub>4</sub>) and evaporated. The residue was column chromatographed (0-10% EtOAc in hexane) to give **D1** (288 mg, 82%) as a light-yellow liquid. <sup>1</sup>H NMR (CDCl<sub>3</sub>, 400 MHz) δ 7.18 (m, 2H), 7.50 (s, 2H), 7.65 (td, *J* = 7.6, 2.0 Hz, 1H), 8.55 (d, *J* = 4.4 Hz, 1H); <sup>13</sup>C NMR (CDCl<sub>3</sub>, 100.6 MHz) δ 83.81, 121.69, 122.98, 136.84, 144.60, 149.90, 155.37.

#### **(E)-2-(4-(Trimethylsilyl)but-1-en-3-yn-1-yl)pyridine; E1. Procedure IV**

Pd(PPh<sub>3</sub>)<sub>2</sub>Cl<sub>2</sub> (32.8 mg, 0.047 mmol) and Cu(I)I (17.8 mg, 0.094 mmol) were added to dry THF (5 mL) in a flame-dried flask equipped with a stir bar under N<sub>2</sub> at room temperature. Then iodovinylpyridine, **D1** (270 mg, 1.17 mmol) was added followed by TMS-acetylene (250 μL, 172.4 mg, 1.76 mmol) and Et<sub>3</sub>N (326 μL, 237 mg, 2.34 mmol). The resulting mixture was stirred for 1h [progress of the reaction was monitored by TLC (*n*-hexane)]. Volatiles were evaporated and the residue was column chromatographed (0-10% EtOAc in hexane) to give **E1** as light brown liquid (226 mg, 96%). <sup>1</sup>H NMR (CDCl<sub>3</sub>, 400 MHz) δ 0.23 (s, 9H), 6.75 (d, *J* = 16.0 Hz, 1H), 7.01 (d, *J* = 16.0 Hz, 1H), 7.16 (ddd, *J* = 7.6, 4.8, 0.8 Hz, 1H), 7.22 (d, *J* = 7.6 Hz, 1H), 7.63 (td, *J* = 7.6, 1.6 Hz, 1H), 8.56 (d, *J* = 4.0 Hz, 1H); <sup>13</sup>C NMR (CDCl<sub>3</sub>, 100.6 MHz) δ 0.03, 99.52, 104.16, 113.02, 122.43, 123.23, 136.87, 140.99, 149.72, 154.14.

#### **(E)-2-(But-1-en-3-yn-1-yl)pyridine; P3. Procedure V**

Anhydrous K<sub>2</sub>CO<sub>3</sub> (166 mg, 1.2 mmol) was added to a stirred solution of **E1** (201 mg, 1.0 mmol) in dry MeOH (5 mL) at room temperature. After for 30 min, volatiles were evaporated and the residue was column chromatographed (0-10% EtOAc in hexane) to give **P3** (116 mg, 90%) as light yellow liquid. <sup>1</sup>H NMR (CDCl<sub>3</sub>, 400 MHz) δ 3.15 (d, *J* = 2.4 Hz, 1H), 6.72 (dd, *J* = 16.0, 2.4 Hz, 1H), 7.05 (d, *J* = 16.0 Hz, 1H), 7.18 (dd, *J* = 7.2, 4.8, Hz, 1H), 7.23 (d, *J* = 8.0 Hz, 1H), 7.64 (td, *J* = 7.6, 1.6 Hz, 1H), 8.56 (d, *J* = 4.4 Hz, 1H); <sup>13</sup>C NMR (CDCl<sub>3</sub>, 100.6 MHz) δ 83.25, 84.73, 113.76, 124.47, 125.37, 138.76, 144.00, 151.93, 155.90.

#### **(E)-3-(2-(Tributylstannyl)vinyl)pyridine; C2.**

Treatment 3-bromopyridine **B2** (500 mg, 3.16 mmol) with *trans*-1,2-bis(tri-*n*-butylstannyl)ethylene by Procedure **II** (column chromatography; EtOAc in hexane 0-10%) gave **C2** (1230 mg, 90%) as a clear oil. <sup>1</sup>H NMR (CDCl<sub>3</sub>, 400 MHz) δ 0.90 (t, *J* = 7.2 Hz, 9H), 0.98 (t, *J* = 8.0 Hz, 6H), 1.35 (m, 6H), 1.54 (m, 6H), 6.85 (d, *J* = 19.6 Hz, 1H), 6.99 (d, *J* = 19.6, Hz, 1H), 7.24 (m, 1H), 7.73 (d, *J* = 8.0 Hz, 1H), 8.45 (br, 1H), 8.61 (br, 1H). <sup>13</sup>C NMR (CDCl<sub>3</sub>, 100.6 MHz) δ 9.82, 13.82, 27.41, 29.23, 123.61, 132.46, 133.63, 134.36, 142.55, 148.33, 148.53.

### **(E)-3-(2-(Iodovinyl)pyridine; D2.**

Treatment of vinyl stannane **C2** (1200 mg, 3.04 mmol) with I<sub>2</sub> by procedure **III** (column chromatography; EtOAc in hexane 0-10%) gave **D2** (650 mg, 92%) as a light yellow liquid. <sup>1</sup>H NMR (CDCl<sub>3</sub>, 400 MHz) δ 6.98 (d, *J* = 14.8 Hz, 1H), 7.27 (m, 1H), 7.43 (d, *J* = 15.2 Hz, 1H), 7.62 (d, *J* = 8.0 Hz, 1H), 8.55 (br, 2H); <sup>13</sup>C NMR (CDCl<sub>3</sub>, 100.6 MHz) δ 79.34, 123.81, 132.66, 133.61, 141.64, 147.60, 149.32.

### **(E)-3-(4-(Trimethylsilyl)but-1-en-3-yn-1-yl)pyridine; E2**

Treatment of iodovinylpyridine **D2** (550 mg, 2.38 mmol) with TMS-acetylene by procedure **IV** (column chromatography; EtOAc in hexane 0-10%) gave **E2** (430 mg, 90%) as light brown liquid. <sup>1</sup>H NMR (DMSO-d<sub>6</sub>, 400 MHz) δ 0.20 (s, 9H), 6.58 (d, *J* = 16.8 Hz, 1H), 7.04 (d, *J* = 16.4 Hz, 1H), 7.39 (m, 1H), 7.98 (d, *J* = 7.6 Hz, 1H), 8.53 (brs, 1H), 8.74 (brs, 1H); <sup>13</sup>C NMR (DMSO-d<sub>6</sub>, 100.6 MHz) δ 0.21, 97.64, 104.54, 110.15, 123.80, 131.54, 132.72, 139.02, 148.17, 149.60.

### **(E)-3-(But-1-en-3-yn-1-yl)pyridine; P5.**

Treatment Silyl protected compound **E2** (403 mg, 2.0 mmol) with K<sub>2</sub>CO<sub>3</sub> by Procedure **V** (column chromatography; EtOAc in hexane 0-10%) gave **P5** (243 mg, 94%) as a light yellow liquid. <sup>1</sup>H NMR (CDCl<sub>3</sub>, 400 MHz) δ 3.11 (d, *J* = 2.4 Hz, 1H), 6.20 (dd, *J* = 16.4, 2.4 Hz, 1H), 7.01 (d, *J* = 16.4 Hz, 1H), 7.27 (dd, *J* = 8.0, 4.8, Hz, 1H), 7.71 (dt, *J* = 8.0, 1.6 Hz, 1H), 7.52 (d, *J* = 3.2 Hz, 1H), 8.61 (s, 1H); <sup>13</sup>C NMR (CDCl<sub>3</sub>, 100.6 MHz) δ 80.61, 82.27, 109.67, 123.77, 131.76, 132.77, 139.45, 148.24, 149.81.

### **(E)-4-(2-(Tributylstannyl)vinyl)pyridine; C3.**

Treatment 4-bromopyridine **B3** (500 mg, 3.16 mmol) with *trans*-1,2-bis(tri-*n*-butylstannyl)ethylene by Procedure **II** (column chromatography; EtOAc in hexane 0-10%) gave **C3** (1025 mg, 75%) as a clear oil. <sup>1</sup>H NMR (CDCl<sub>3</sub>, 400 MHz) δ 0.90 (t, *J* = 7.2 Hz, 9H), 0.99 (t, *J* = 8.0 Hz, 6H), 1.3 (sex, *J* = 7.2 Hz, 6H), 1.54 (m, 6H), 6.81 (d, *J* = 19.6 Hz, 1H), 7.18 (d, *J* = 19.6 Hz, 1H), 7.25 (dd, *J* = 4.4, 1.2 Hz, 2H), 8.54 (dd, *J* = 4.4, 1.6 Hz, 2H); <sup>13</sup>C NMR δ 9.80, 13.82, 27.40, 29.20, 120.57, 137.20, 143.70, 145.50, 150.26.

### **(E)-4-(2-(Iodovinyl)pyridine; D3.**

Treatment of **C3** (1000 mg, 2.54 mmol) with I<sub>2</sub> by procedure **III** (column chromatography; EtOAc in hexane 0-10%) gave **D3** (440 mg, 75%) as a light yellow liquid. <sup>1</sup>H NMR (CDCl<sub>3</sub>, 400 MHz) δ 7.16 (dd, *J* = 4.4, 1.6 Hz, 2H), 7.21 (d, *J* = 14.8 Hz, 1H), 7.40 (d, *J* = 14.8 Hz, 1H), 8.57 (dd, *J* = 4.4, 1.6 Hz, 2H); <sup>13</sup>C NMR (CDCl<sub>3</sub>,

100.6 MHz)  $\delta$  83.04, 120.37, 143.02, 145.51, 150.53. This compound is very unstable, decomposes in open air and even in freezer when stored for more than 2 weeks.

**(E)-4-(4-(Trimethylsilyl)but-1-en-3-yn-1-yl)pyridine; E3**

Treatment of iodovinylpyridine **D3** (462 mg, 2.0 mmol) with TMS-acetylene by procedure **IV** (column chromatography; EtOAc in hexane 0-10%) gave **E3** (322 mg, 80%) as a gummy solid.  $^1\text{H}$  NMR ( $\text{CDCl}_3$ , 400 MHz)  $\delta$  0.23 (s, 9H), 6.36 (d,  $J = 16.0$  Hz, 1H), 6.90 (d,  $J = 16.0$  Hz, 1H), 7.22 (d,  $J = 6.0$  Hz, 2H), 8.55 (d,  $J = 5.6$  Hz, 2H);  $^{13}\text{C}$  NMR ( $\text{CDCl}_3$ , 100.6 MHz)  $\delta$  0.09, 100.26, 103.23, 113.17, 120.73, 139.55, 143.37, 150.36.

**(E)-4-(But-1-en-3-yn-1-yl)pyridine; P7.**

Treatment **E3** (220 mg, 1.09 mmol) with  $\text{K}_2\text{CO}_3$  by Procedure **V** (column chromatography; EtOAc in hexane 10-20%) gave **P7** (243 mg, 94%) as a light yellow solid.  $^1\text{H}$  NMR ( $\text{CDCl}_3$ , 400 MHz)  $\delta$  3.18 (d,  $J = 2.4$  Hz, 1H), 6.32 (d,  $J = 16.4$  Hz, 1H), 6.95 (d,  $J = 16.4$  Hz, 1H), 7.23 (dd,  $J = 4.4, 1.6$  Hz, 2H), 8.58 (dd,  $J = 4.4, 1.6$  Hz, 2H);  $^{13}\text{C}$  NMR ( $\text{CDCl}_3$ , 100.6 MHz)  $\delta$  81.91, 112.15, 120.59, 140.55, 143.05, 150.54.

**(Z)-3-(4-(Trimethylsilyl)but-1-en-3-yn-1-yl)pyridine; F.**

Treatment of commercially available (*Z*)-3-(2-(bromovinyl)pyridine (300 mg, 1.63 mmol) with TMS-acetylene by procedure **IV** (column chromatography; EtOAc in hexane 0-10%) gave **F** (322 mg, 98%) as light brown liquid.  $^1\text{H}$  NMR ( $\text{DMSO-d}_6$ , 400 MHz)  $\delta$  0.23 (s, 9H), 5.98 (d,  $J = 12.4$  Hz, 1H), 6.86 (d,  $J = 12.0$  Hz, 1H), 7.43 (dd,  $J = 8.0, 4.8$  Hz, 1H), 8.37 (d,  $J = 8.0$  Hz, 1H), 8.52 (br, 1H), 8.95 (br, 1H);  $^{13}\text{C}$  NMR ( $\text{DMSO-d}_6$ , 100.6 MHz)  $\delta$  0.46, 103.07, 103.43, 109.40, 123.28, 131.67, 134.60, 136.67, 149.38, 149.73.

**(Z)-3-(But-1-en-3-yn-1-yl)pyridine; P9.**

Treatment **F** (300 mg, 1.49 mmol) with  $\text{K}_2\text{CO}_3$  by Procedure **V** (column chromatography; EtOAc in hexane 0-10%) gave **P9** (164 mg, 85%) as a light yellow liquid.  $^1\text{H}$  NMR ( $\text{CDCl}_3$ , 400 MHz)  $\delta$  3.41 (dd,  $J = 2.4, 0.8$  Hz, 1H), 5.82 (dd,  $J = 12.0, 2.4$  Hz, 1H), 6.70 (d,  $J = 12.0$  Hz, 1H), 7.30 (dd,  $J = 8.0, 4.8$  Hz, 1H), 8.38 (dt,  $J = 8.0, 1.6$  Hz, 1H), 7.52 (d,  $J = 4.0$  Hz, 1H), 8.88 (s, 1H);  $^{13}\text{C}$  NMR ( $\text{CDCl}_3$ , 100.6 MHz)  $\delta$  81.36, 85.47, 109.19, 123.39, 132.07, 135.16, 136.95, 149.42, 150.31.

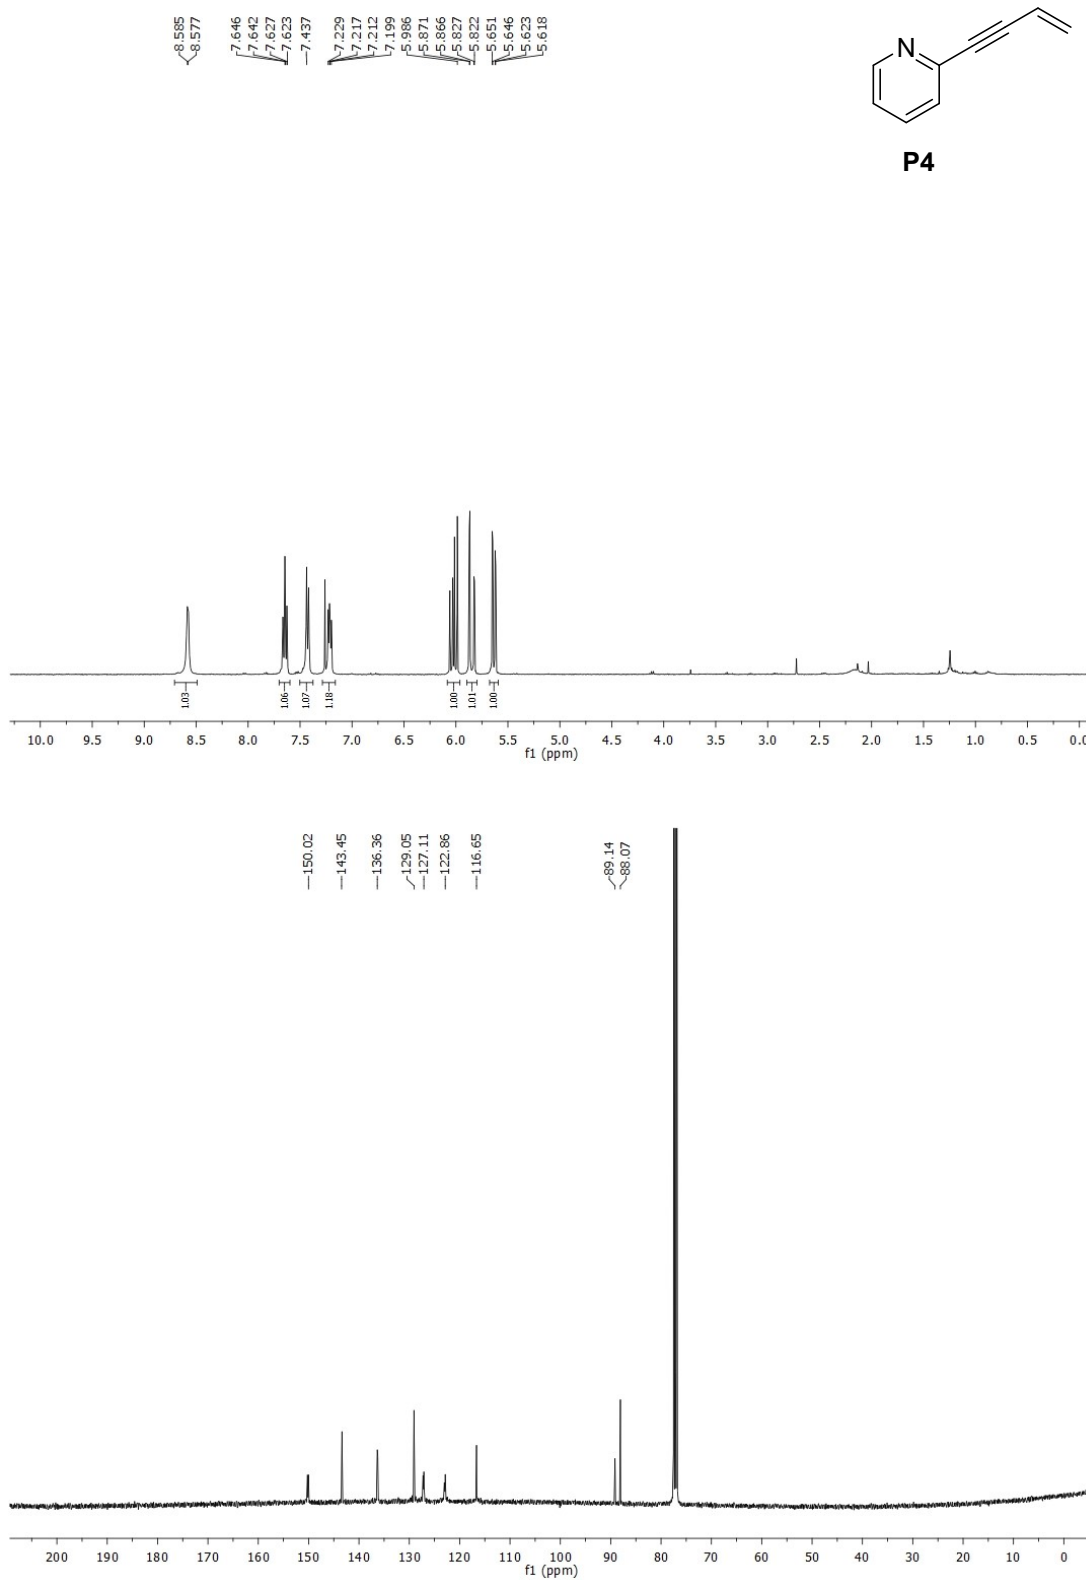

Figure S6. <sup>1</sup>H NMR and <sup>13</sup>C NMR spectra of compound **P4** in CDCl<sub>3</sub>.

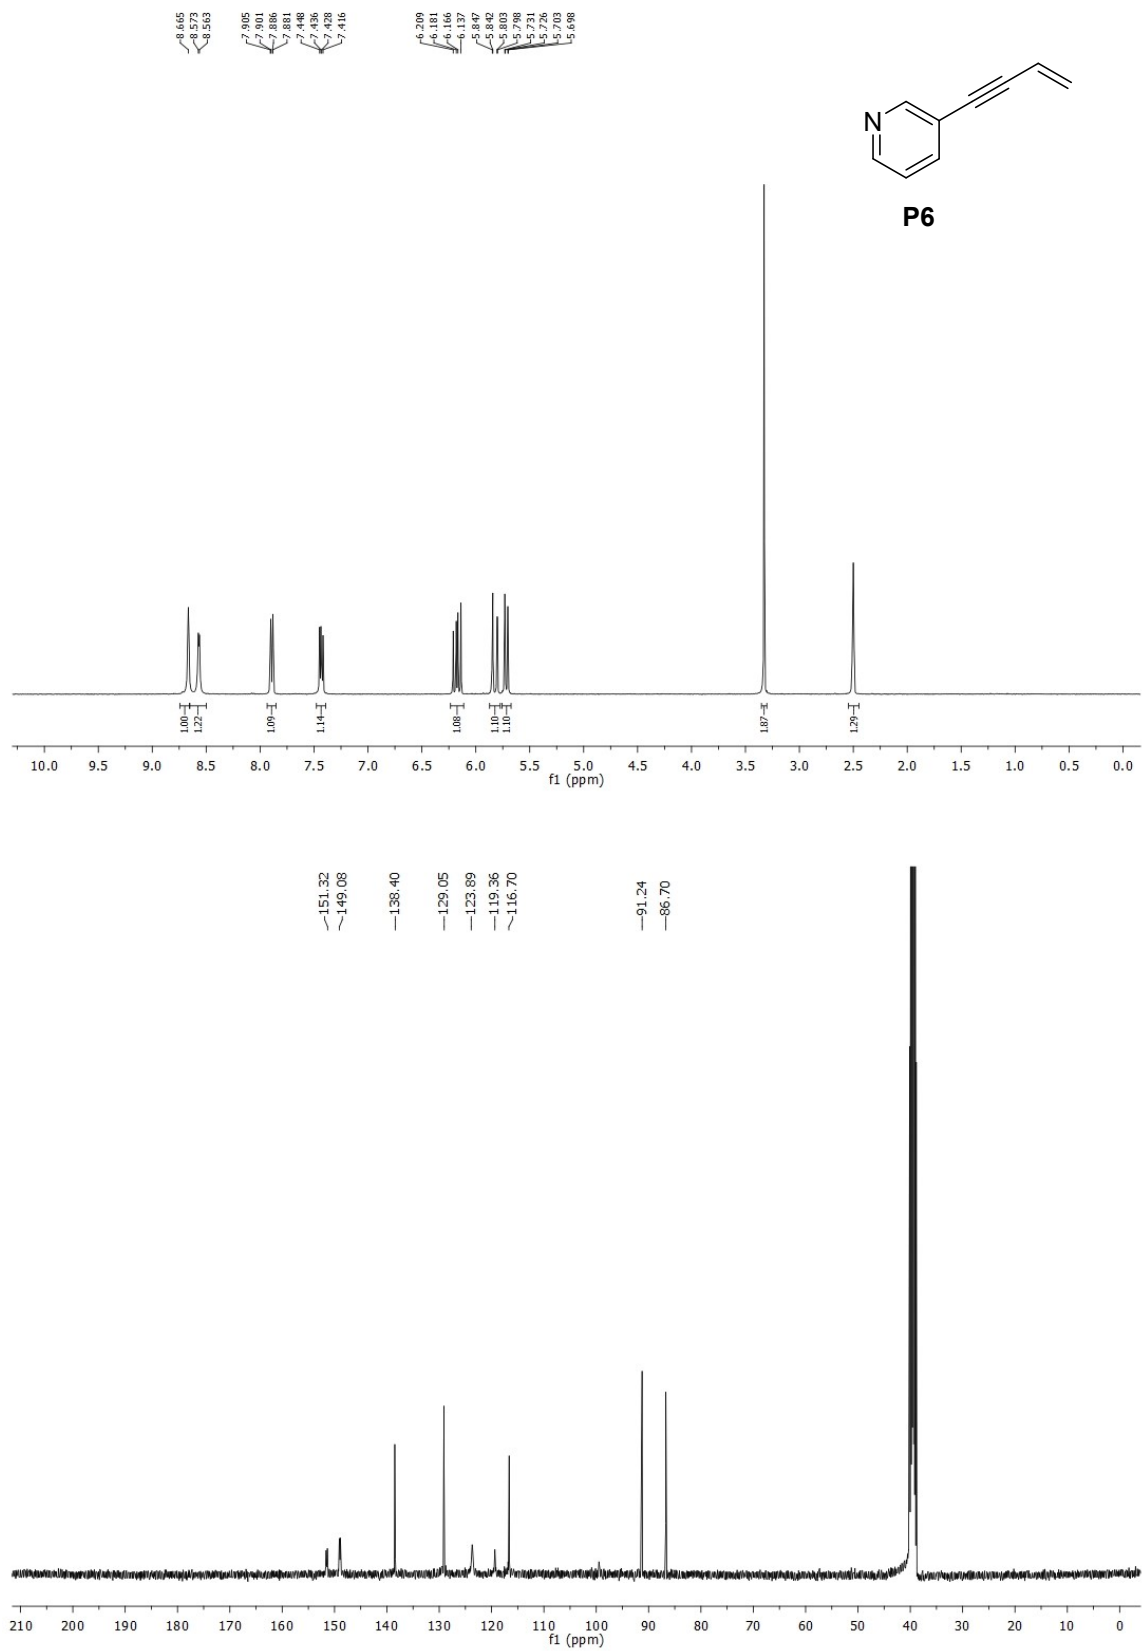

Figure S7. <sup>1</sup>H NMR and <sup>13</sup>C NMR spectra of compound **P6** in DMSO.



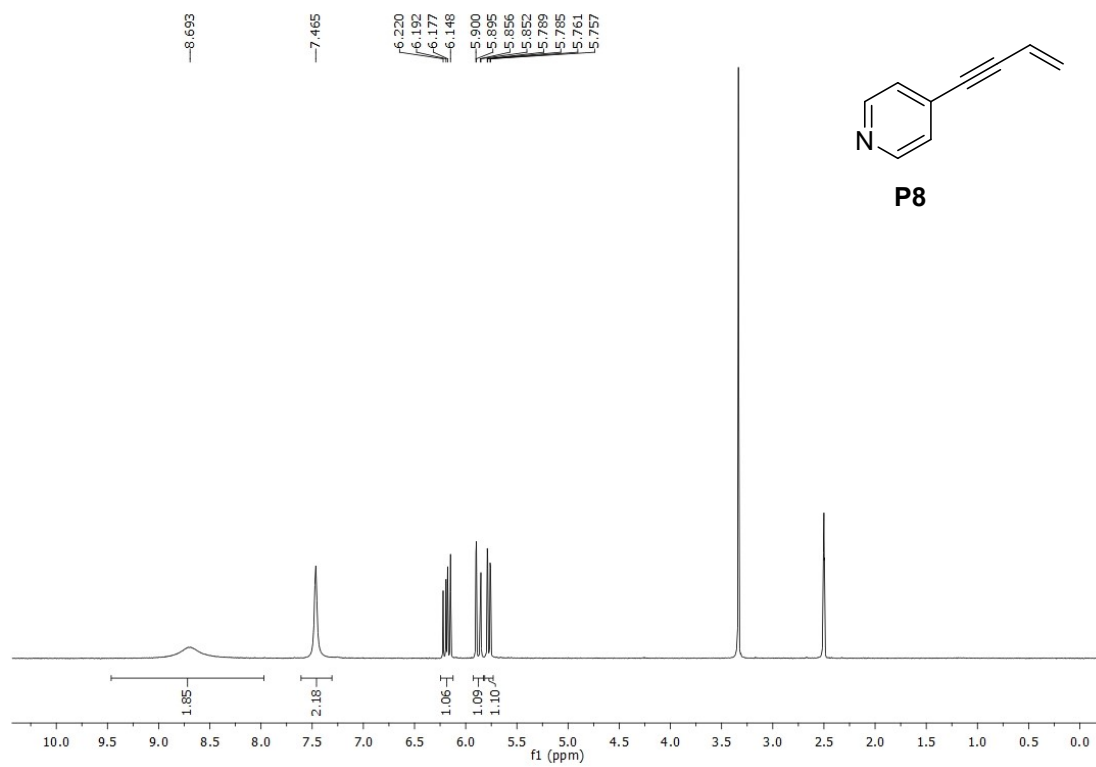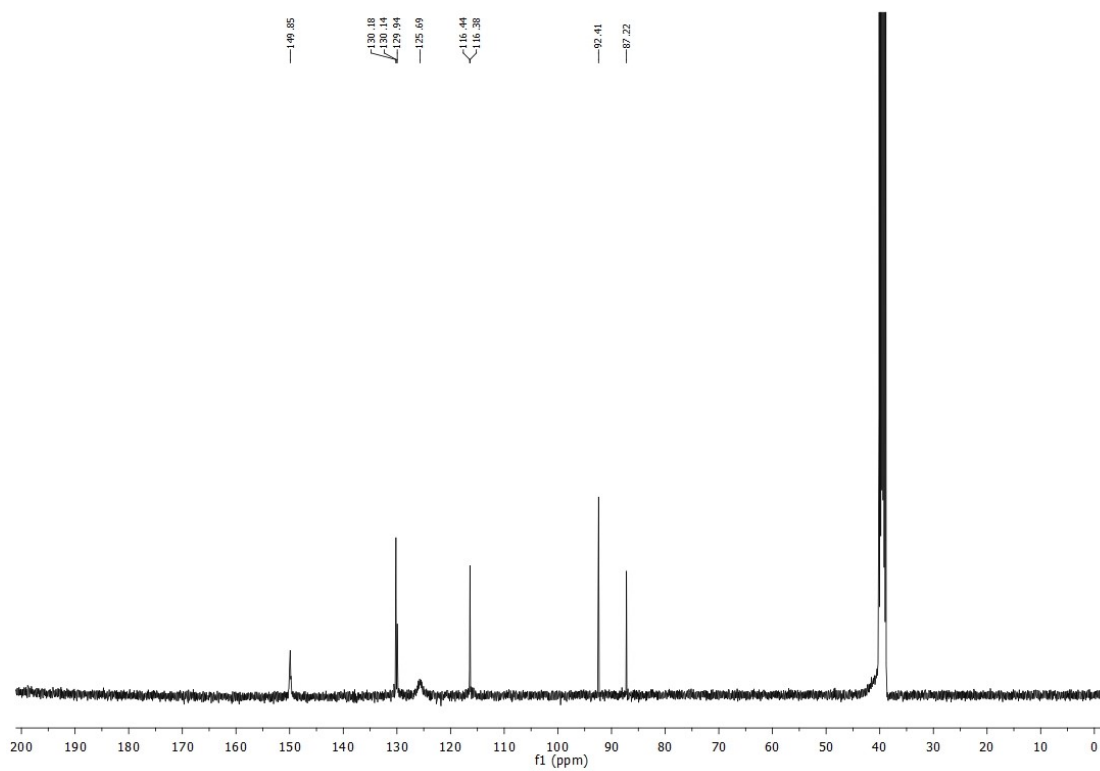

Figure S8.  $^1\text{H}$  NMR and  $^{13}\text{C}$  NMR spectra of compound **P8** in DMSO.

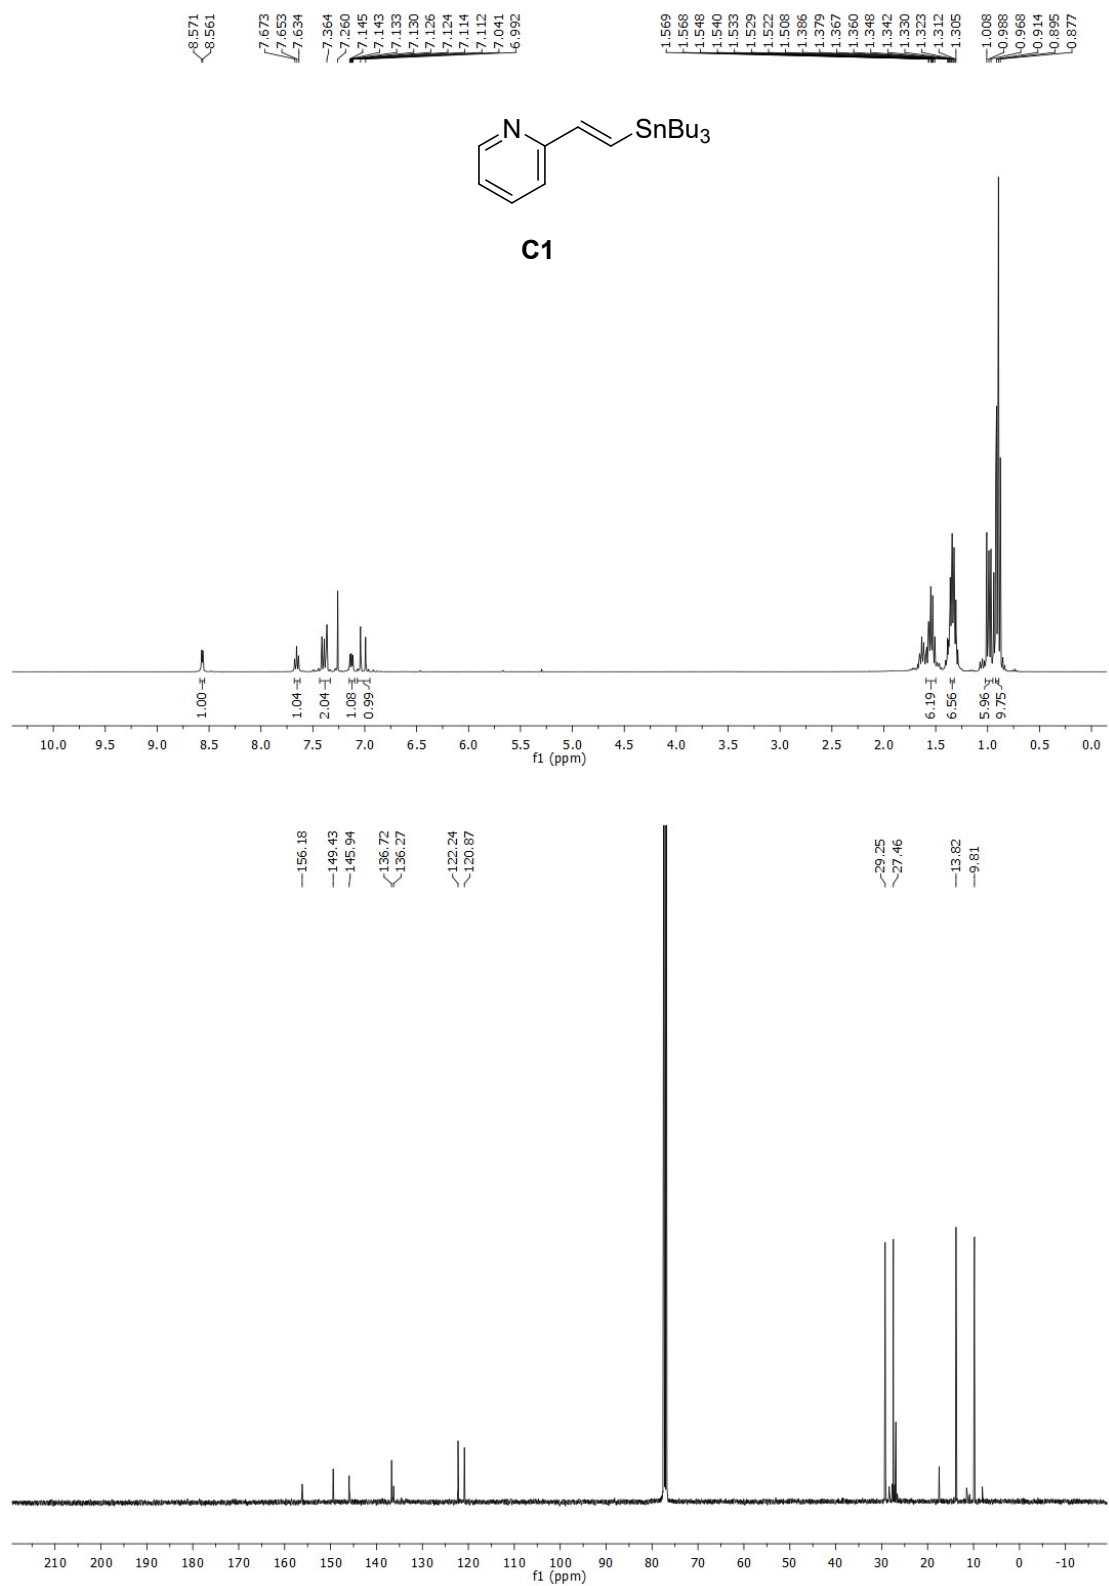

Figure S9. <sup>1</sup>H NMR and <sup>13</sup>C NMR spectra of compound C1 in CDCl<sub>3</sub>.

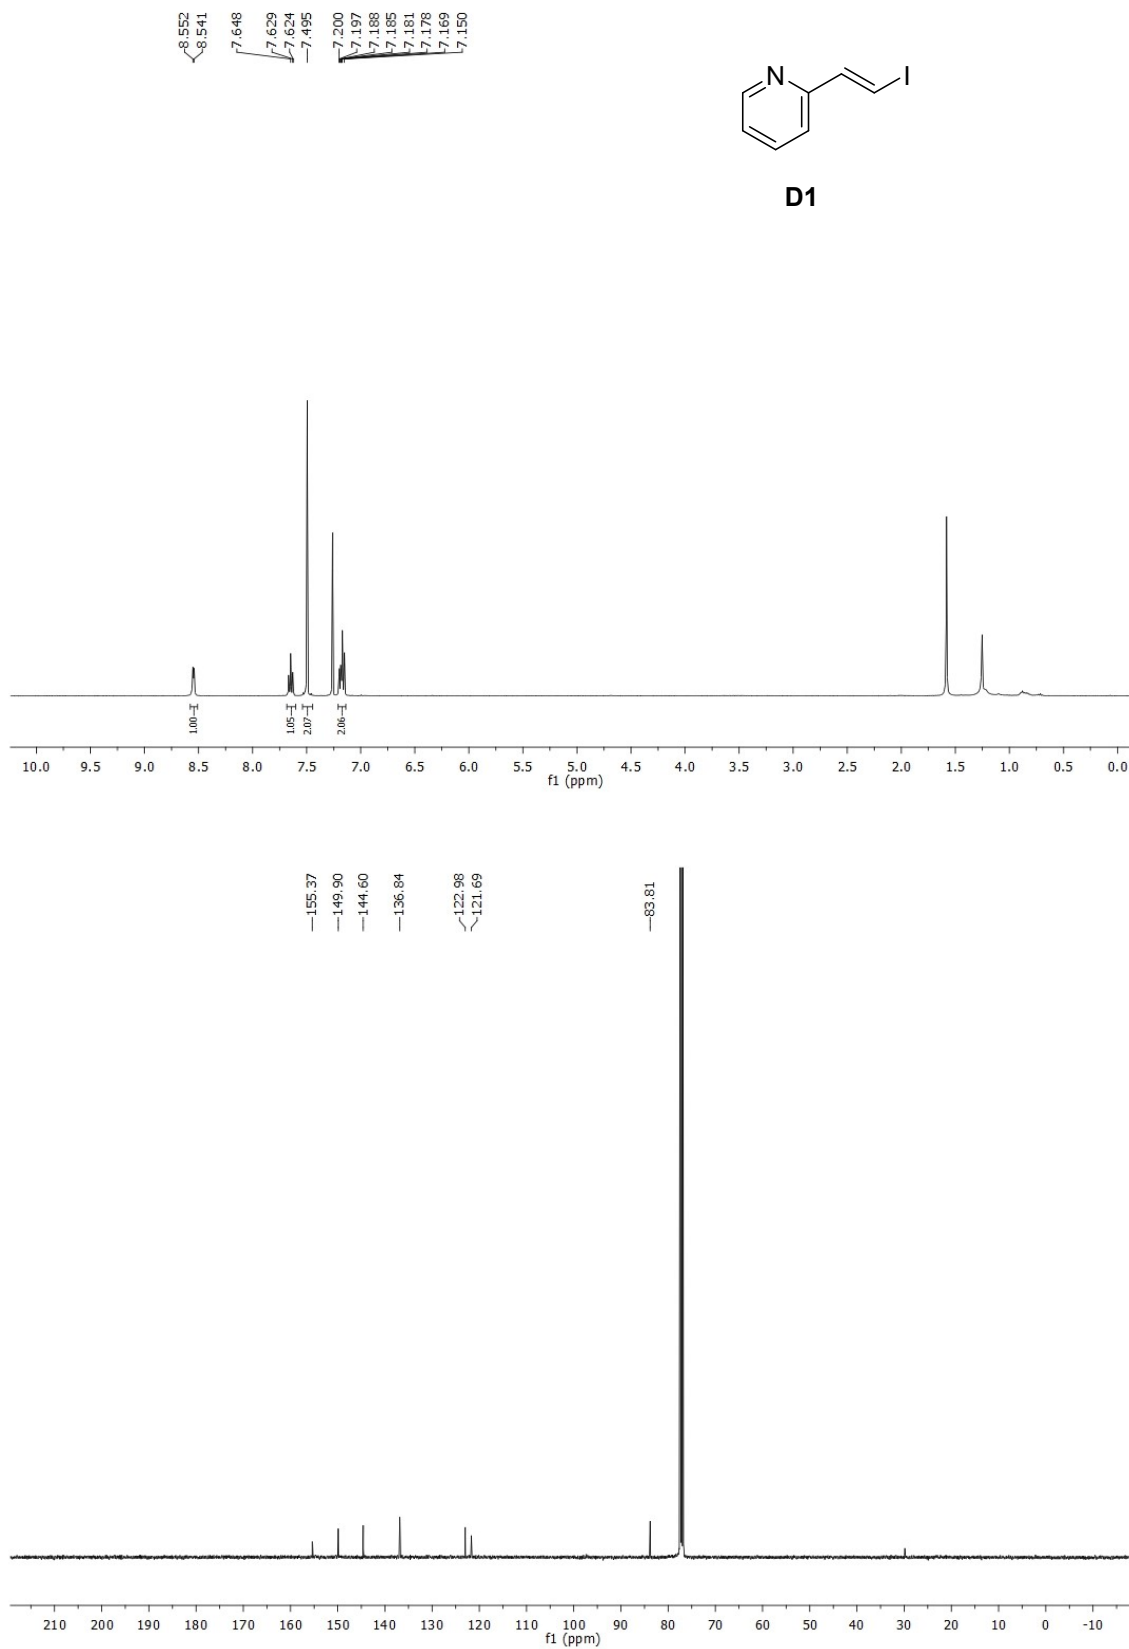

Figure S10. <sup>1</sup>H NMR and <sup>13</sup>C NMR spectra of compound **D1** in CDCl<sub>3</sub>.

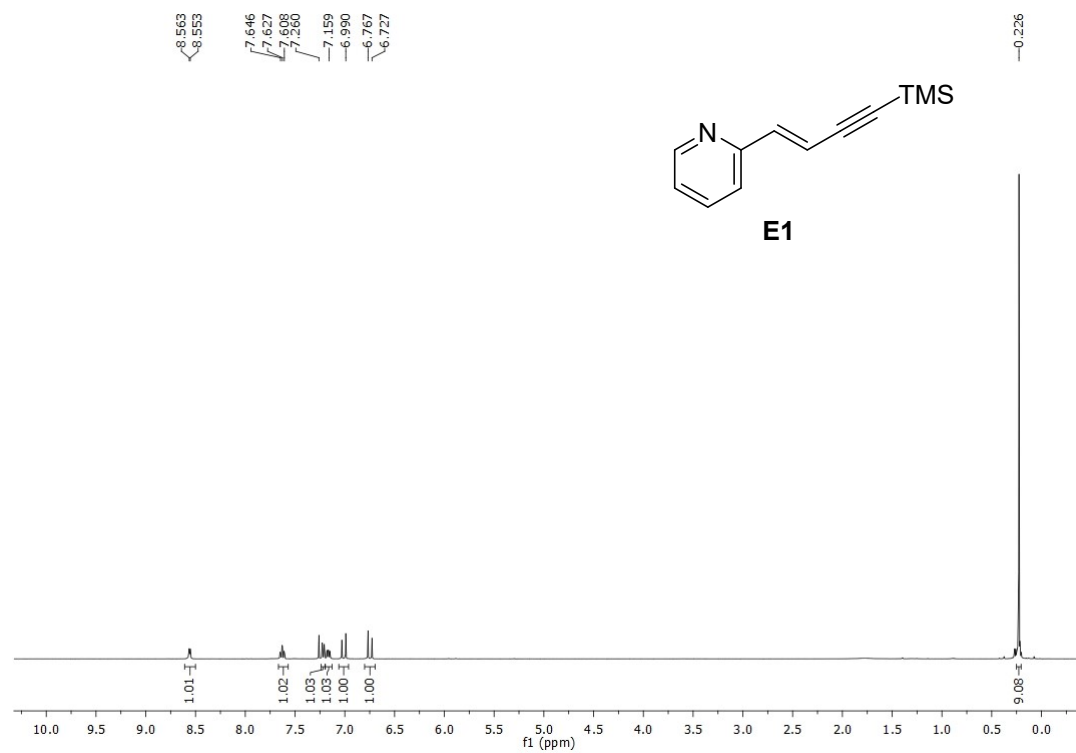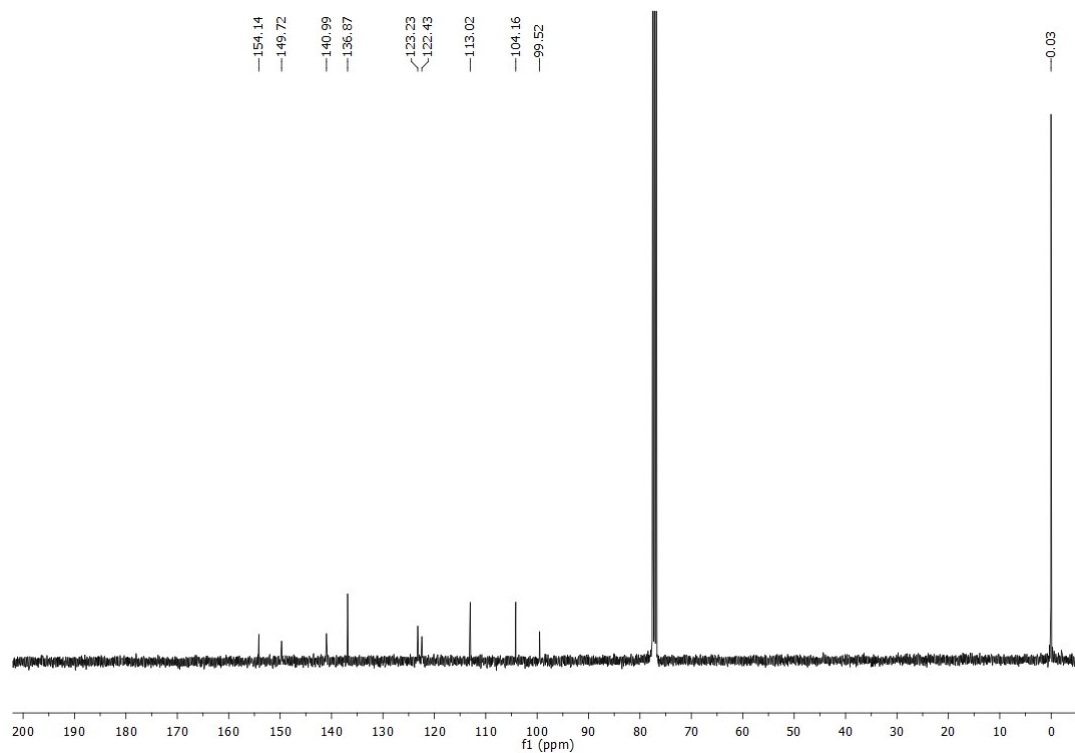

Figure S11. <sup>1</sup>H NMR and <sup>13</sup>C NMR spectra of compound **E1** in CDCl<sub>3</sub>.

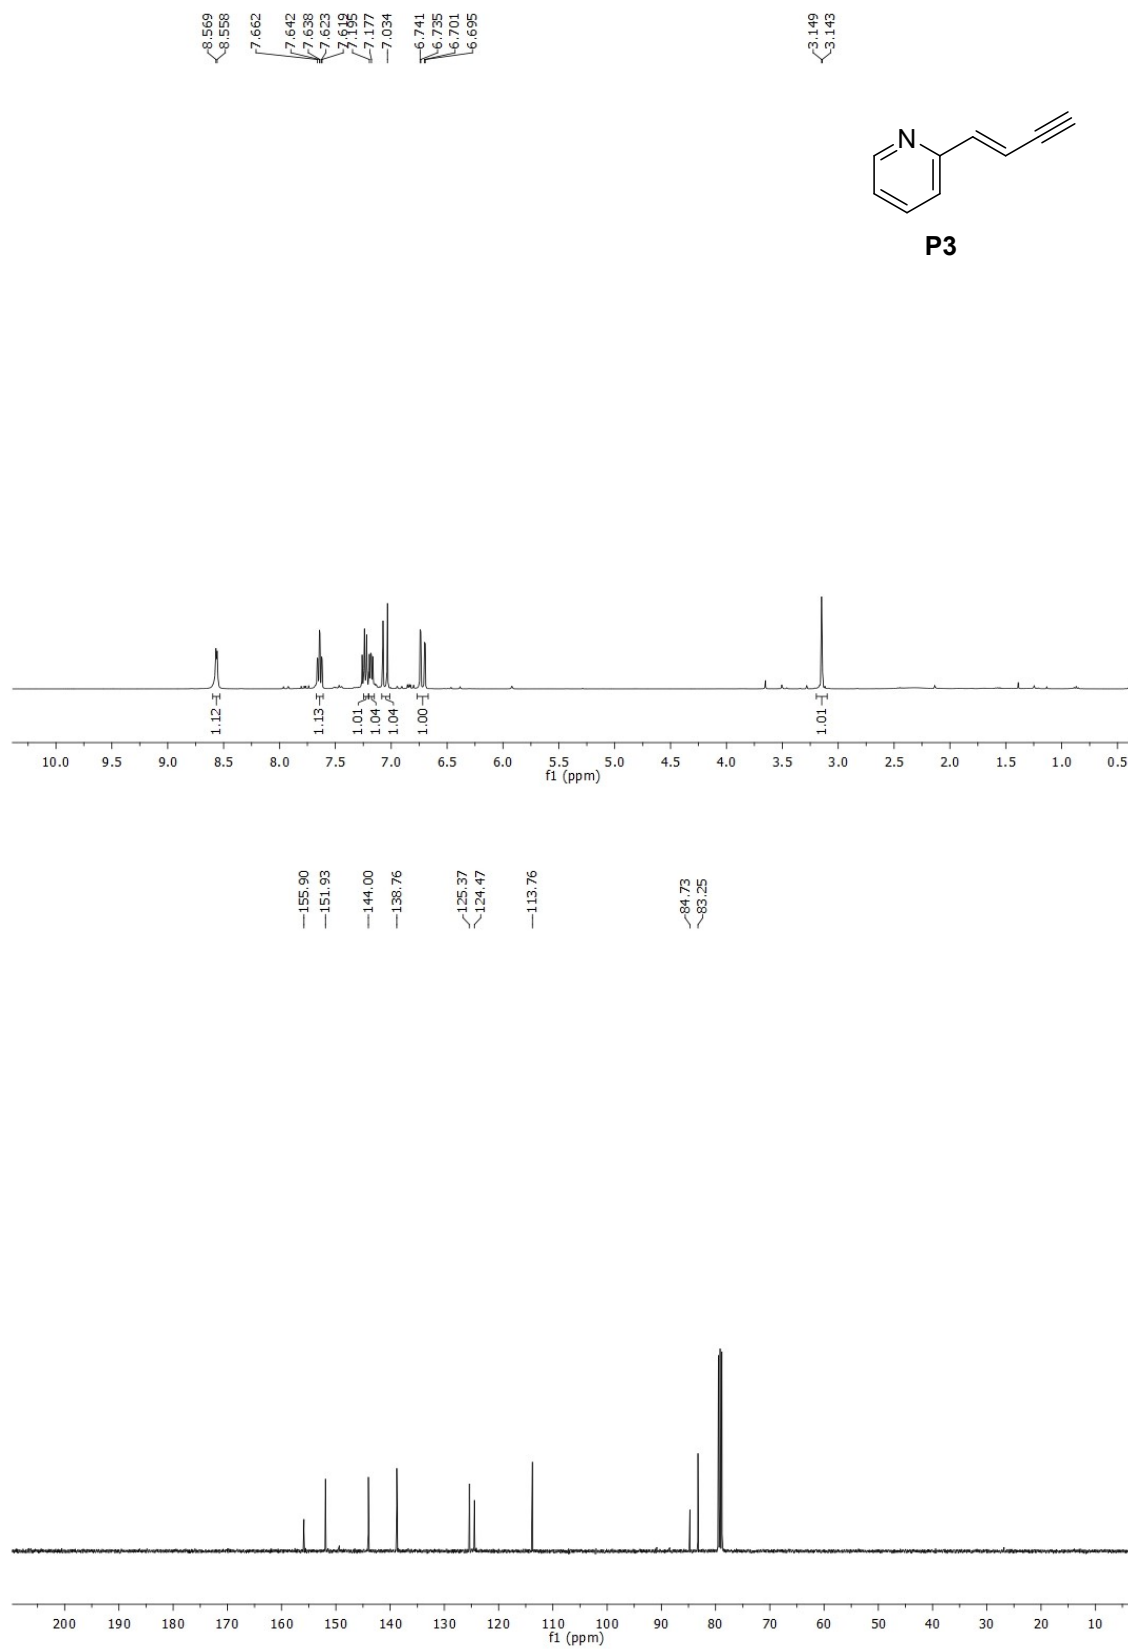

Figure S12. <sup>1</sup>H NMR and <sup>13</sup>C NMR spectra of compound **P3** in CDCl<sub>3</sub>.

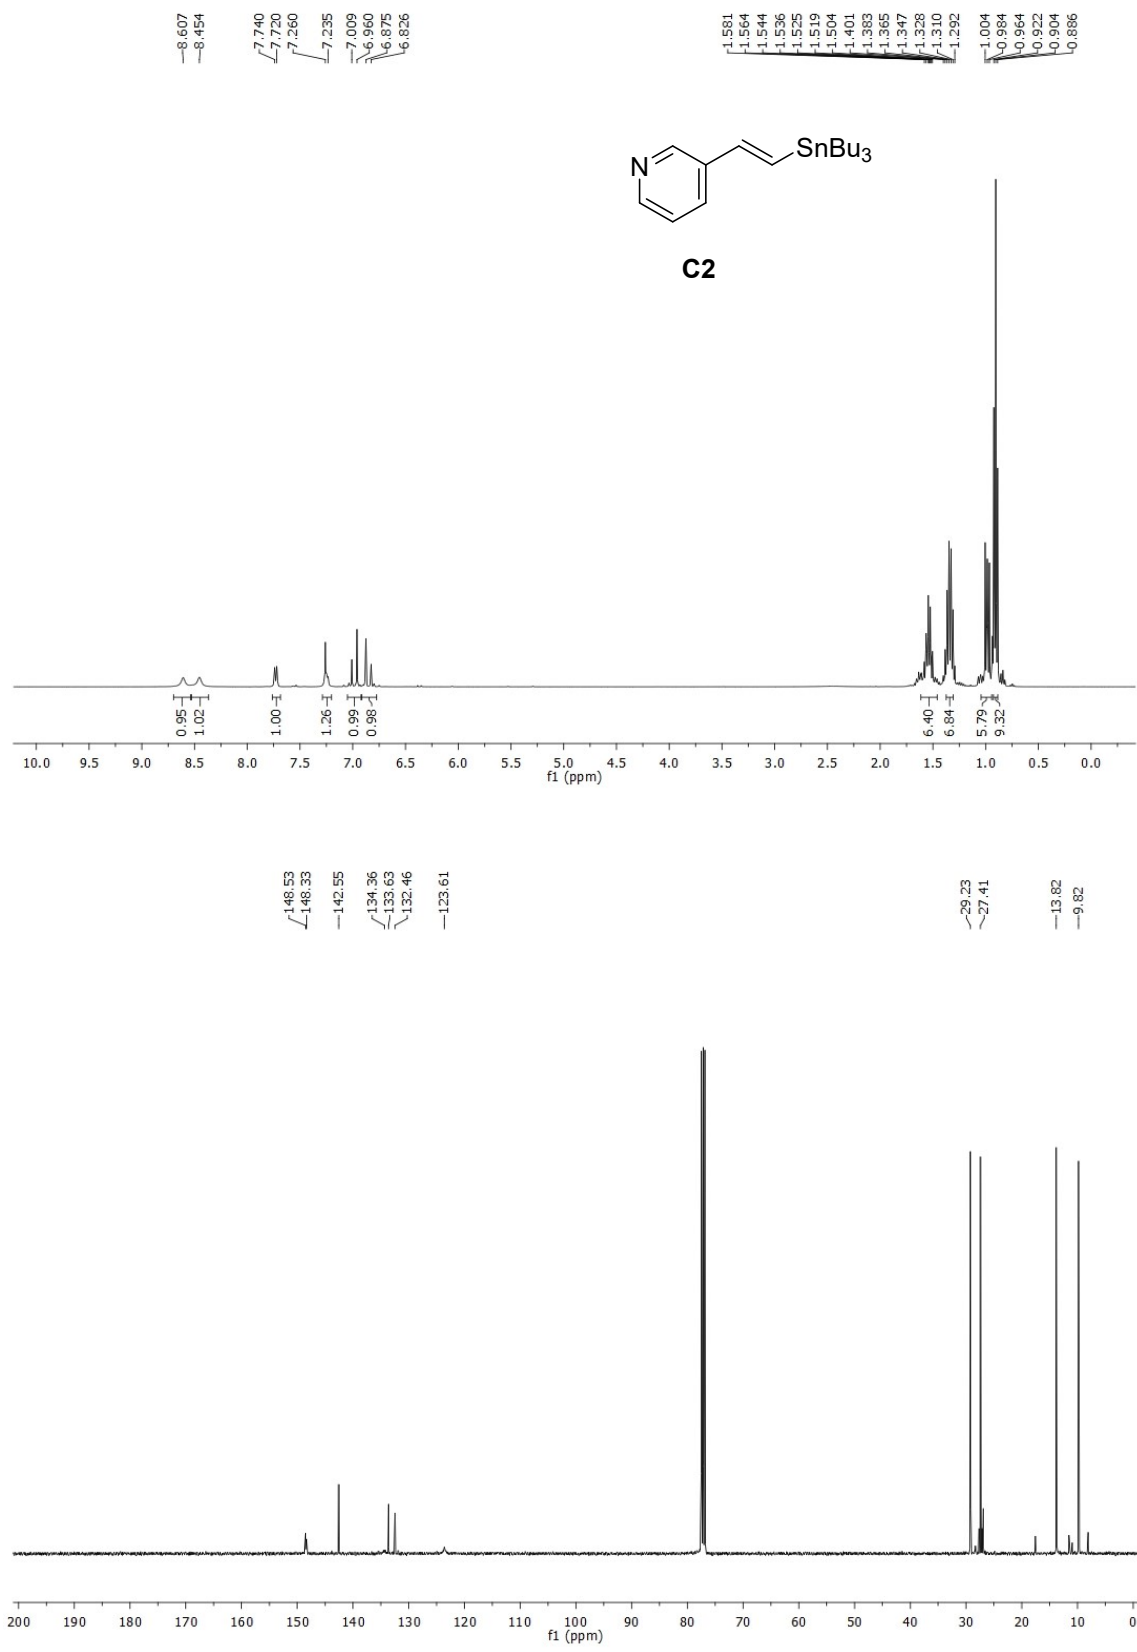

Figure S13.  $^1\text{H}$  NMR and  $^{13}\text{C}$  NMR spectra of compound **C2** in  $\text{CDCl}_3$ .

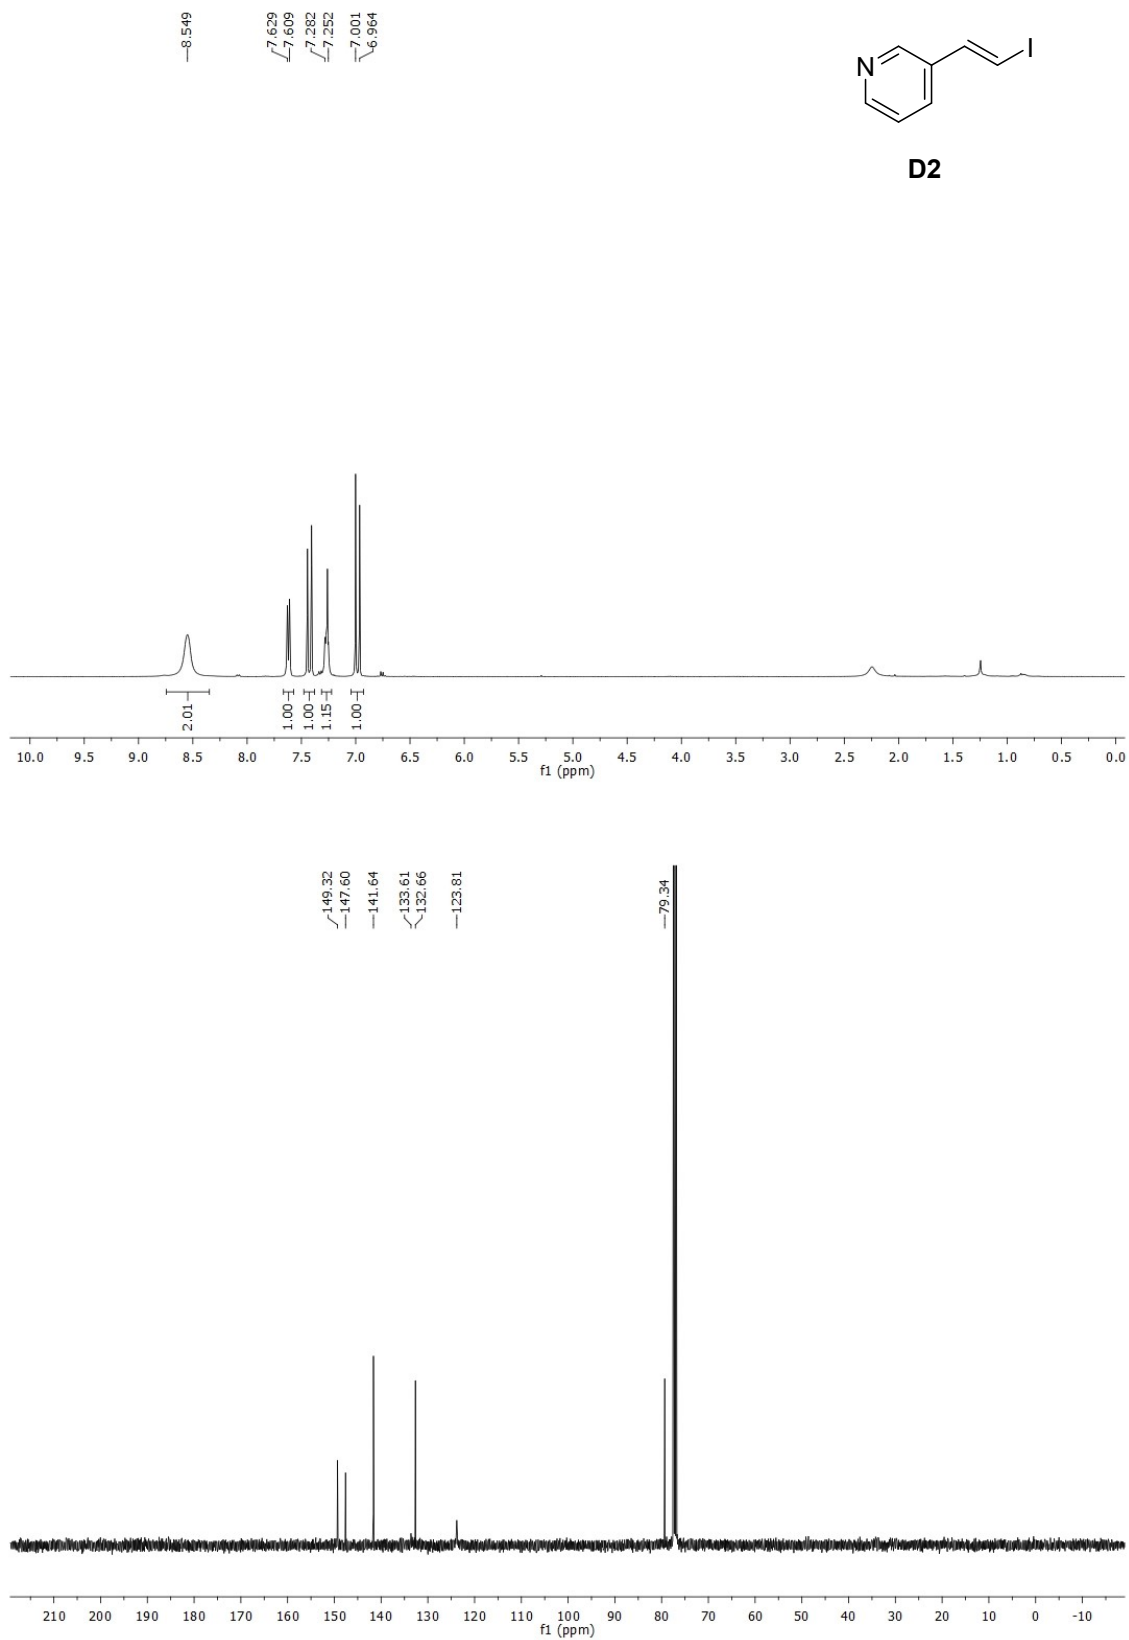

Figure S14. <sup>1</sup>H NMR and <sup>13</sup>C NMR spectra of compound **D2** in CDCl<sub>3</sub>.

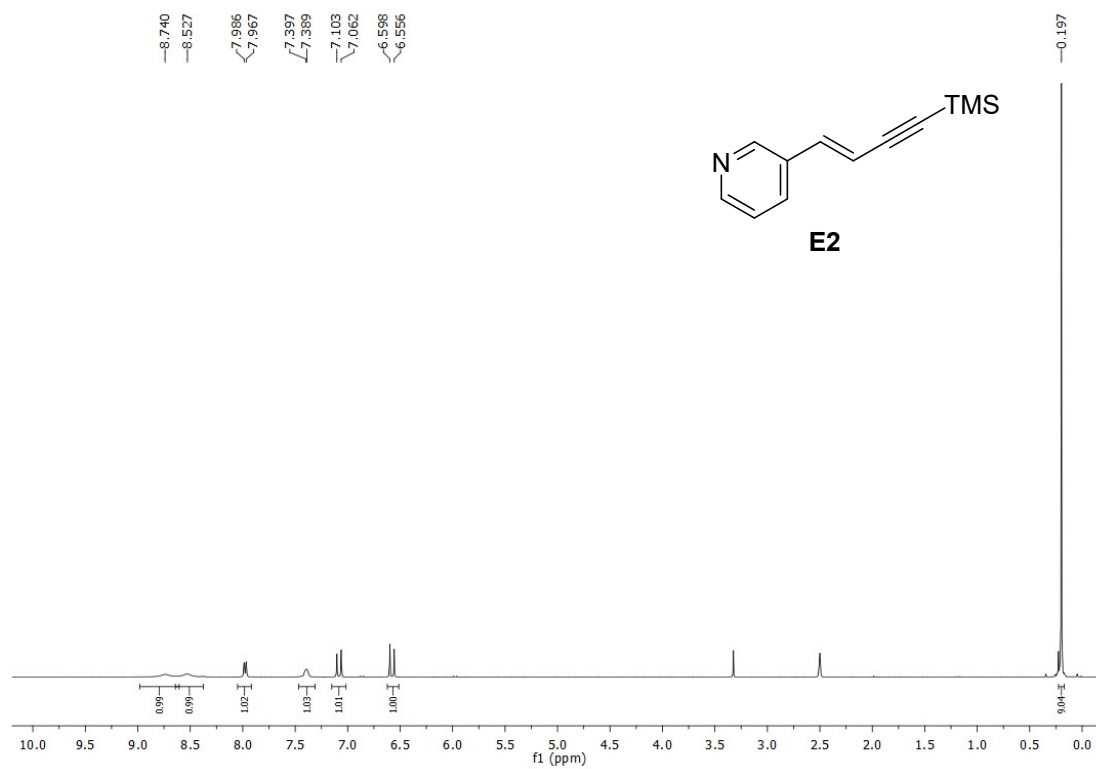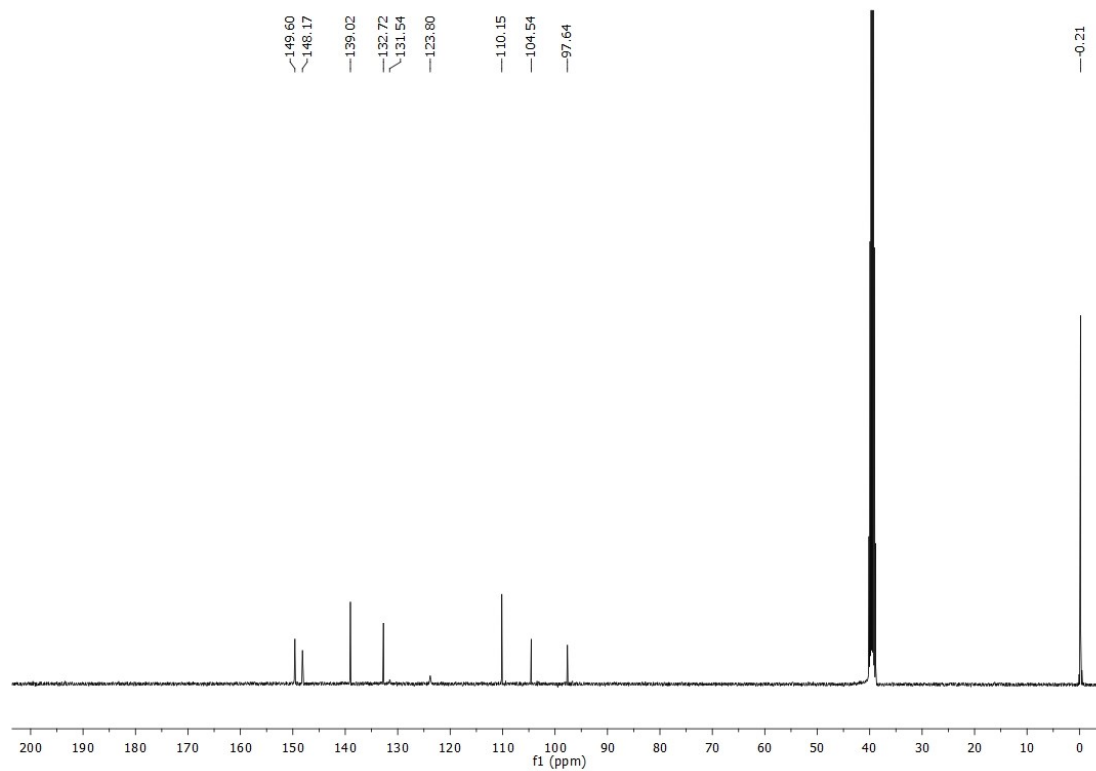

Figure S15. <sup>1</sup>H NMR and <sup>13</sup>C NMR spectra of compound **E2** in DMSO.



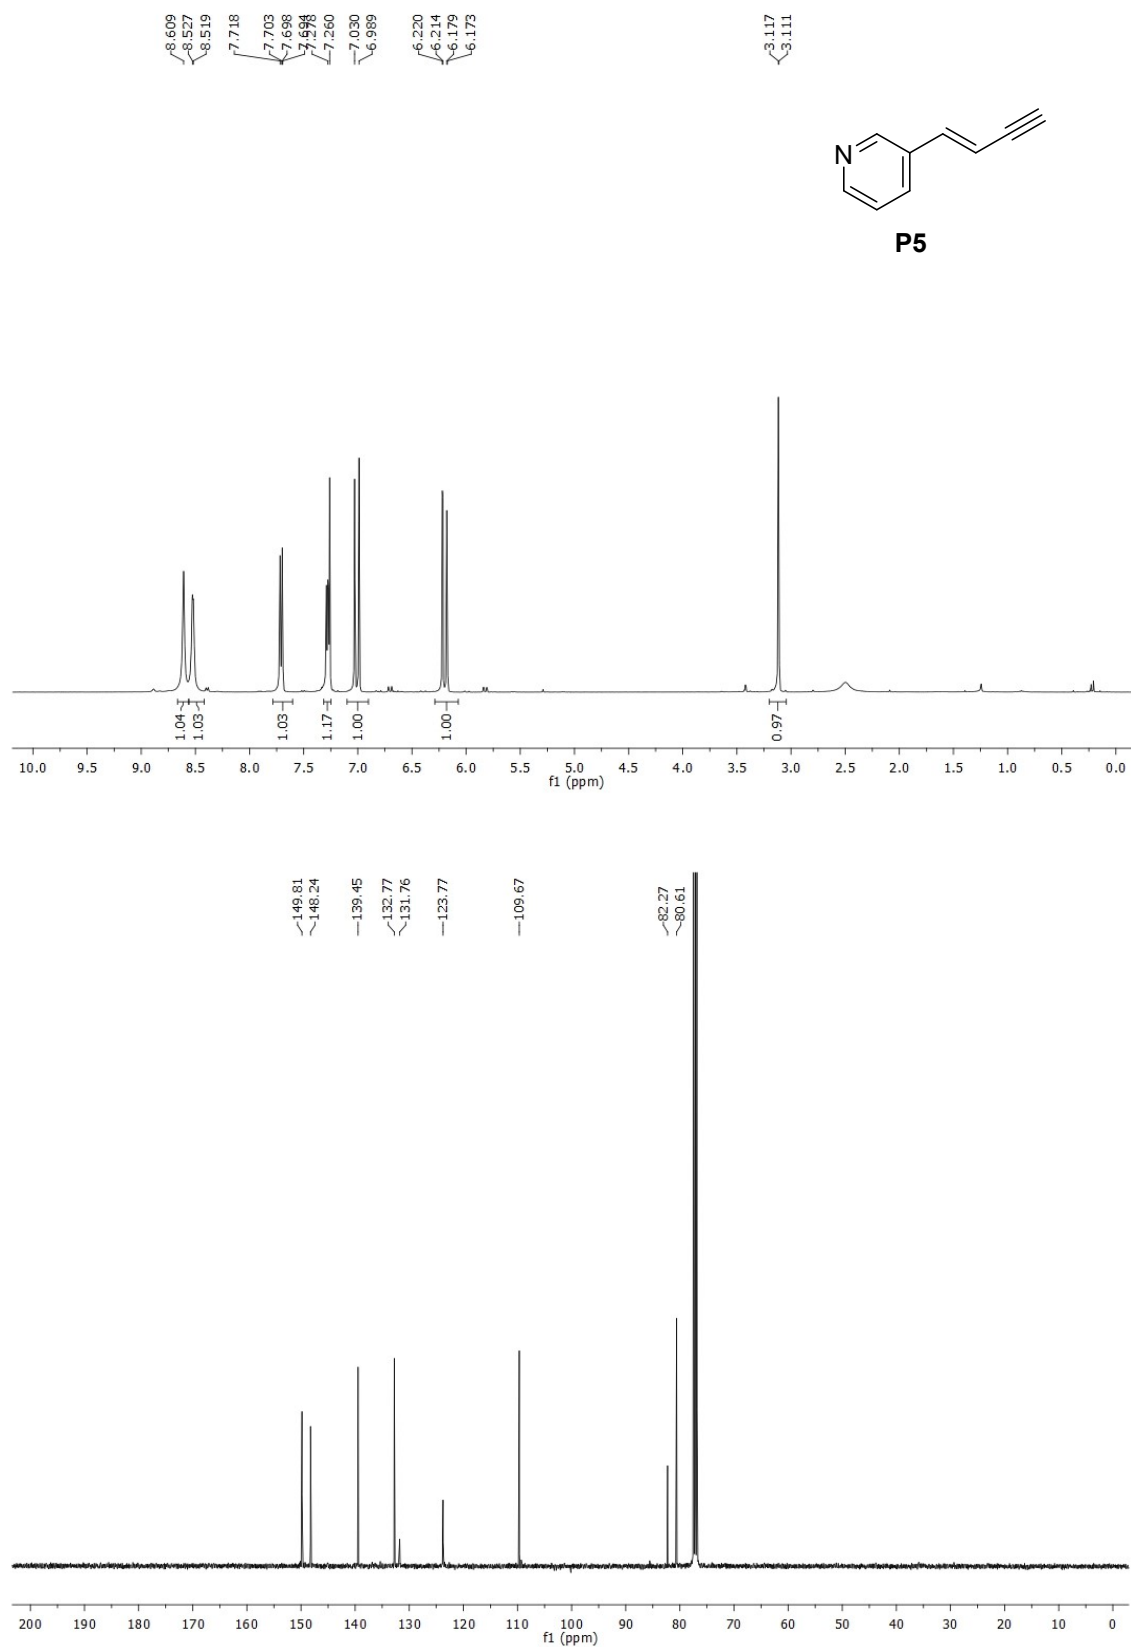

Figure S16. <sup>1</sup>H NMR and <sup>13</sup>C NMR spectra of compound **P5** in CDCl<sub>3</sub>.

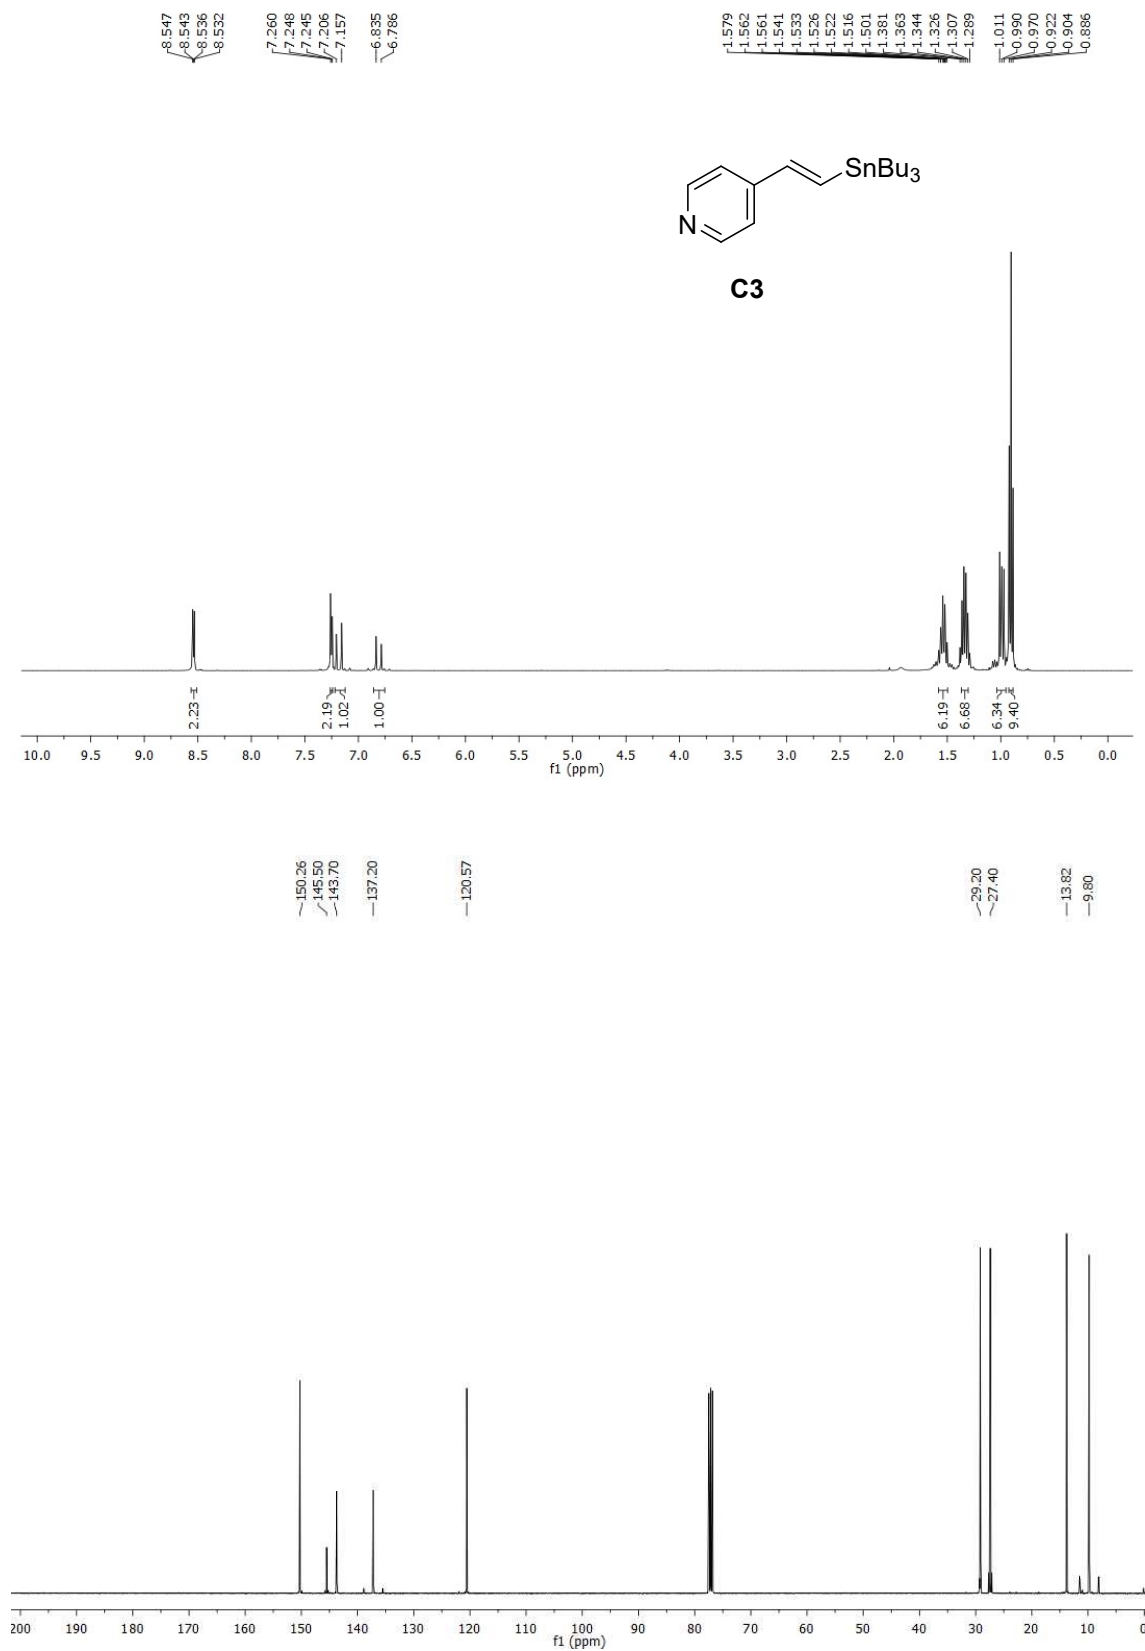

Figure S17. <sup>1</sup>H NMR and <sup>13</sup>C NMR spectra of compound **C3** in CDCl<sub>3</sub>.

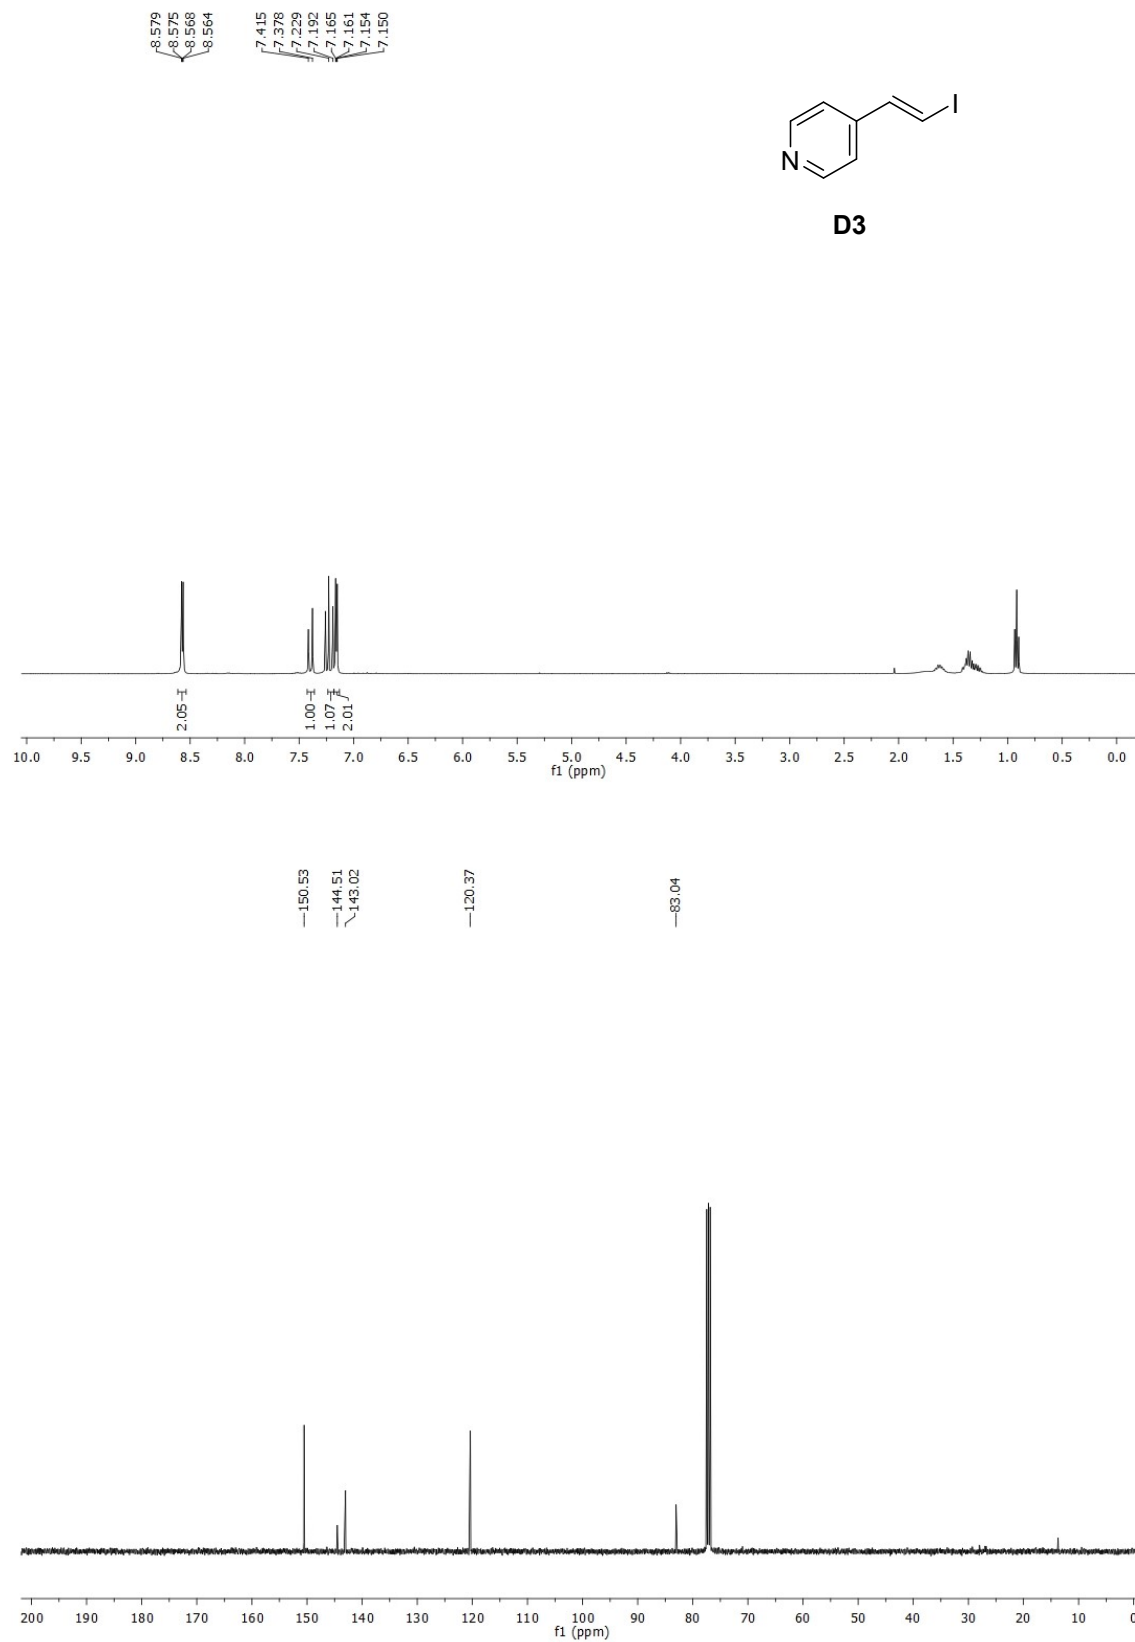

Figure S18. <sup>1</sup>H NMR and <sup>13</sup>C NMR spectra of compound **D3** in CDCl<sub>3</sub>.

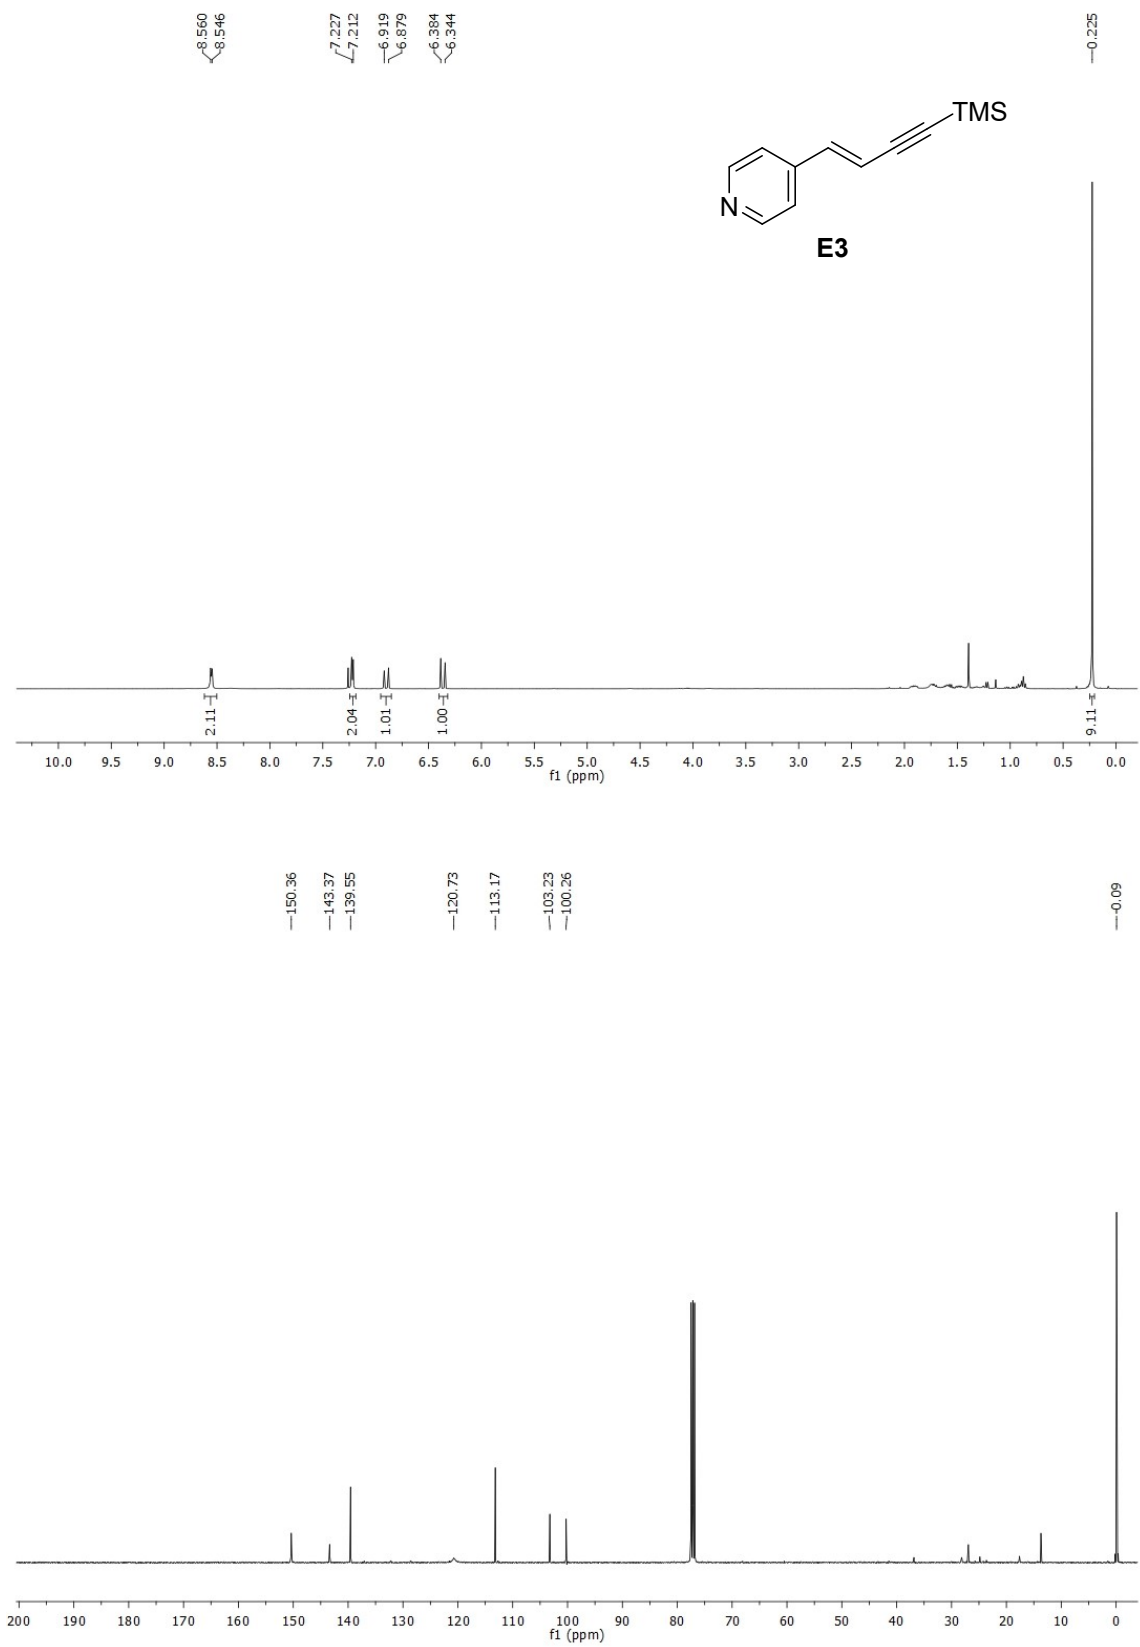

Figure S19. <sup>1</sup>H NMR and <sup>13</sup>C NMR spectra of compound **E3** in CDCl<sub>3</sub>.

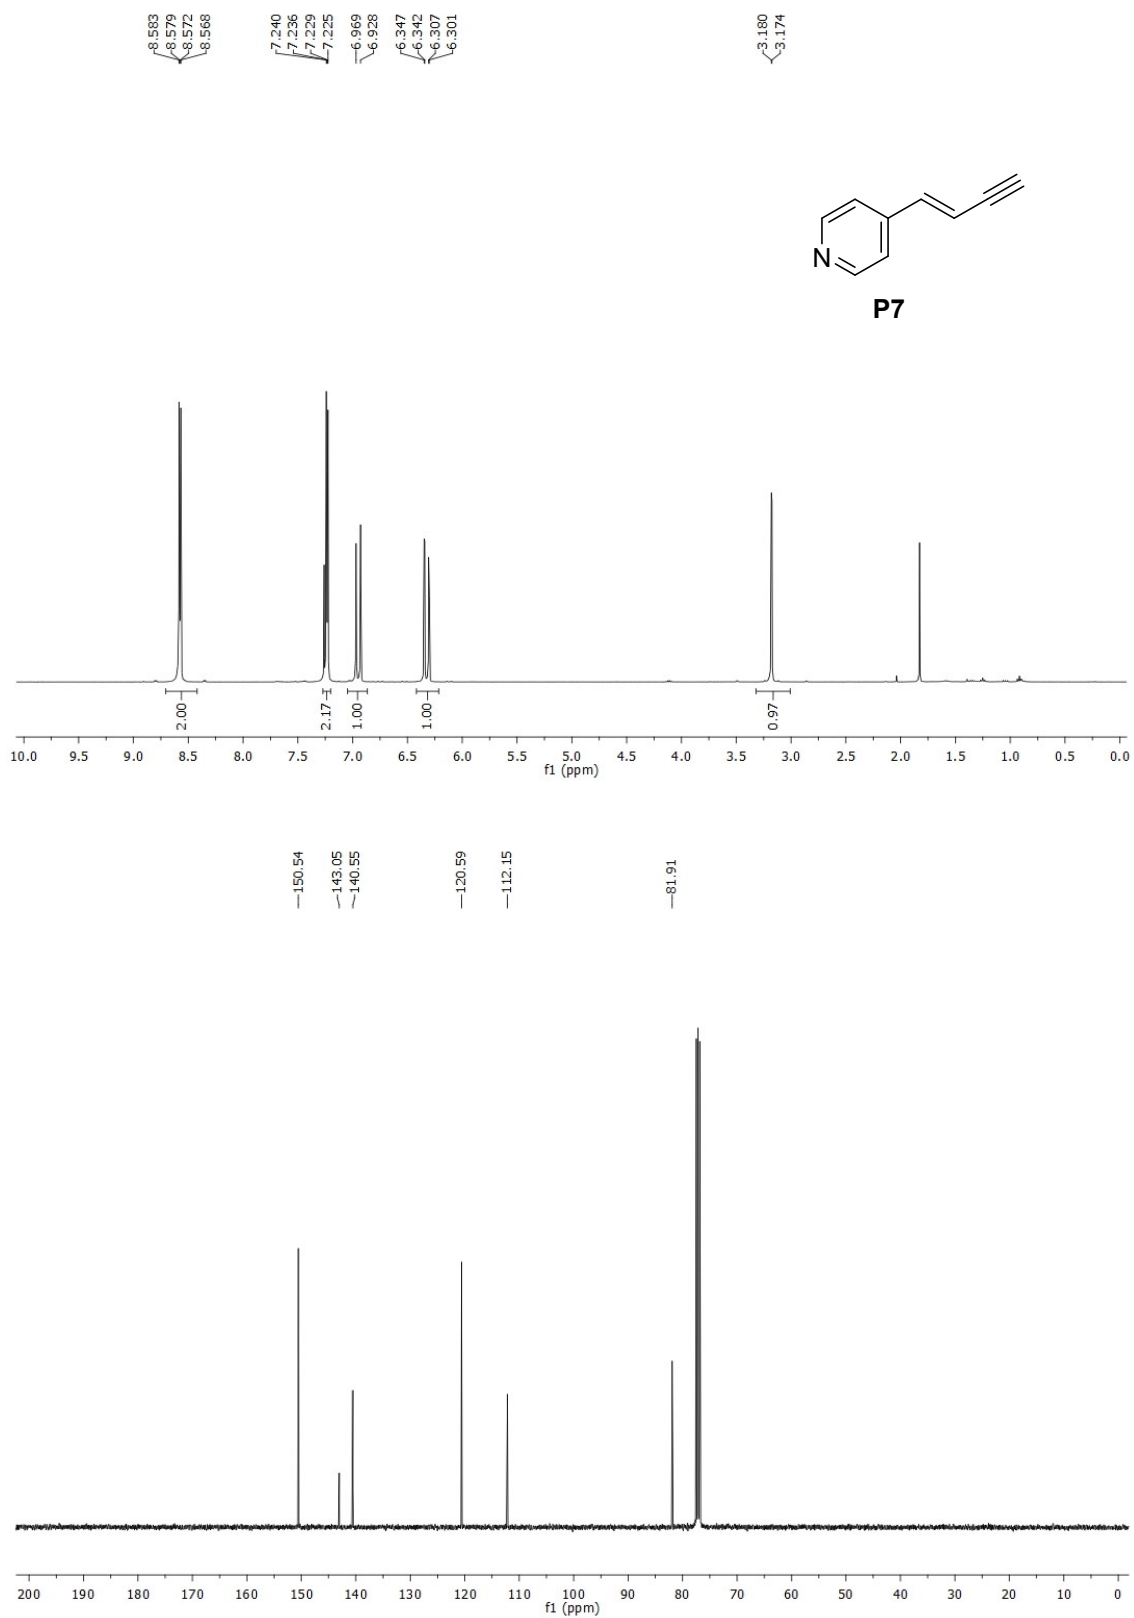

Figure S20. <sup>1</sup>H NMR and <sup>13</sup>C NMR spectra of compound **P7** in CDCl<sub>3</sub>.

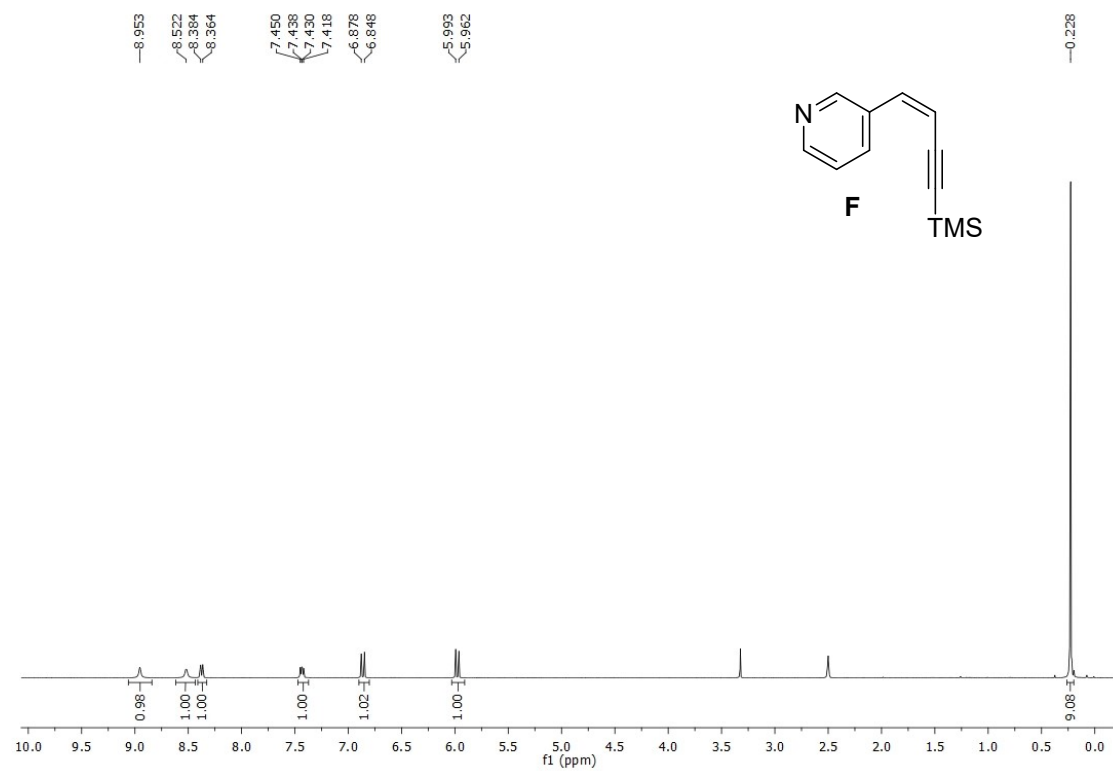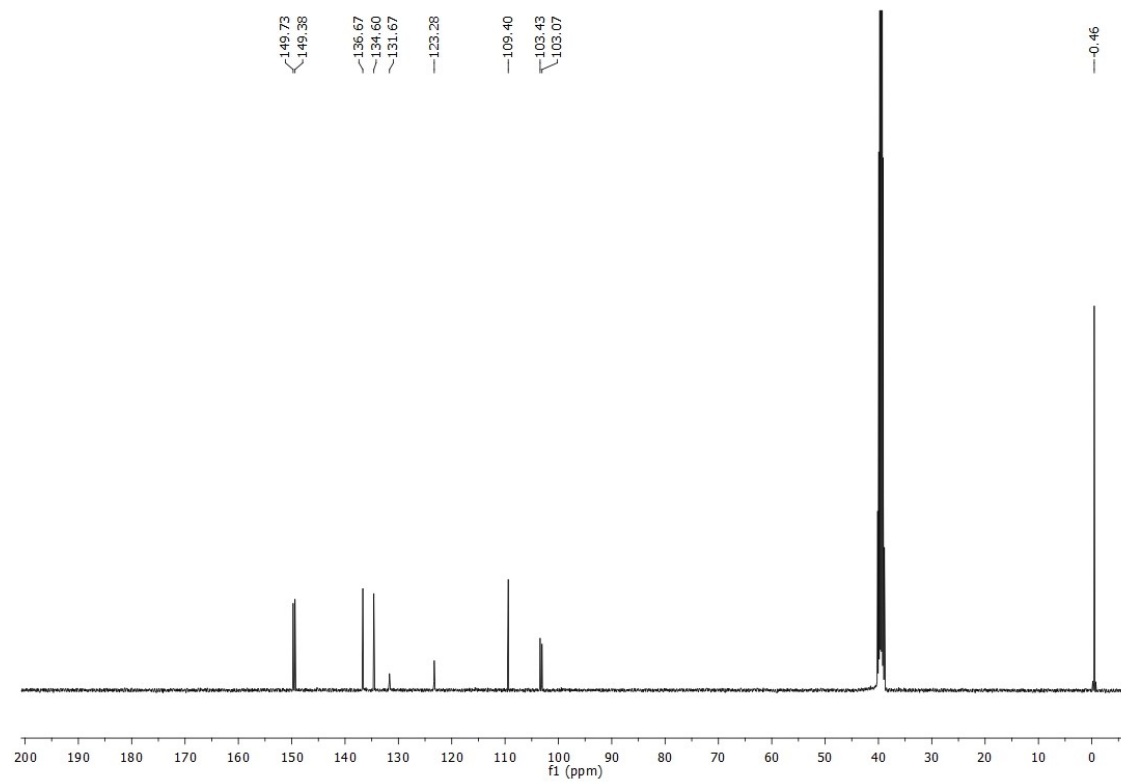

Figure S21. <sup>1</sup>H NMR and <sup>13</sup>C NMR spectra of compound F in DMSO.

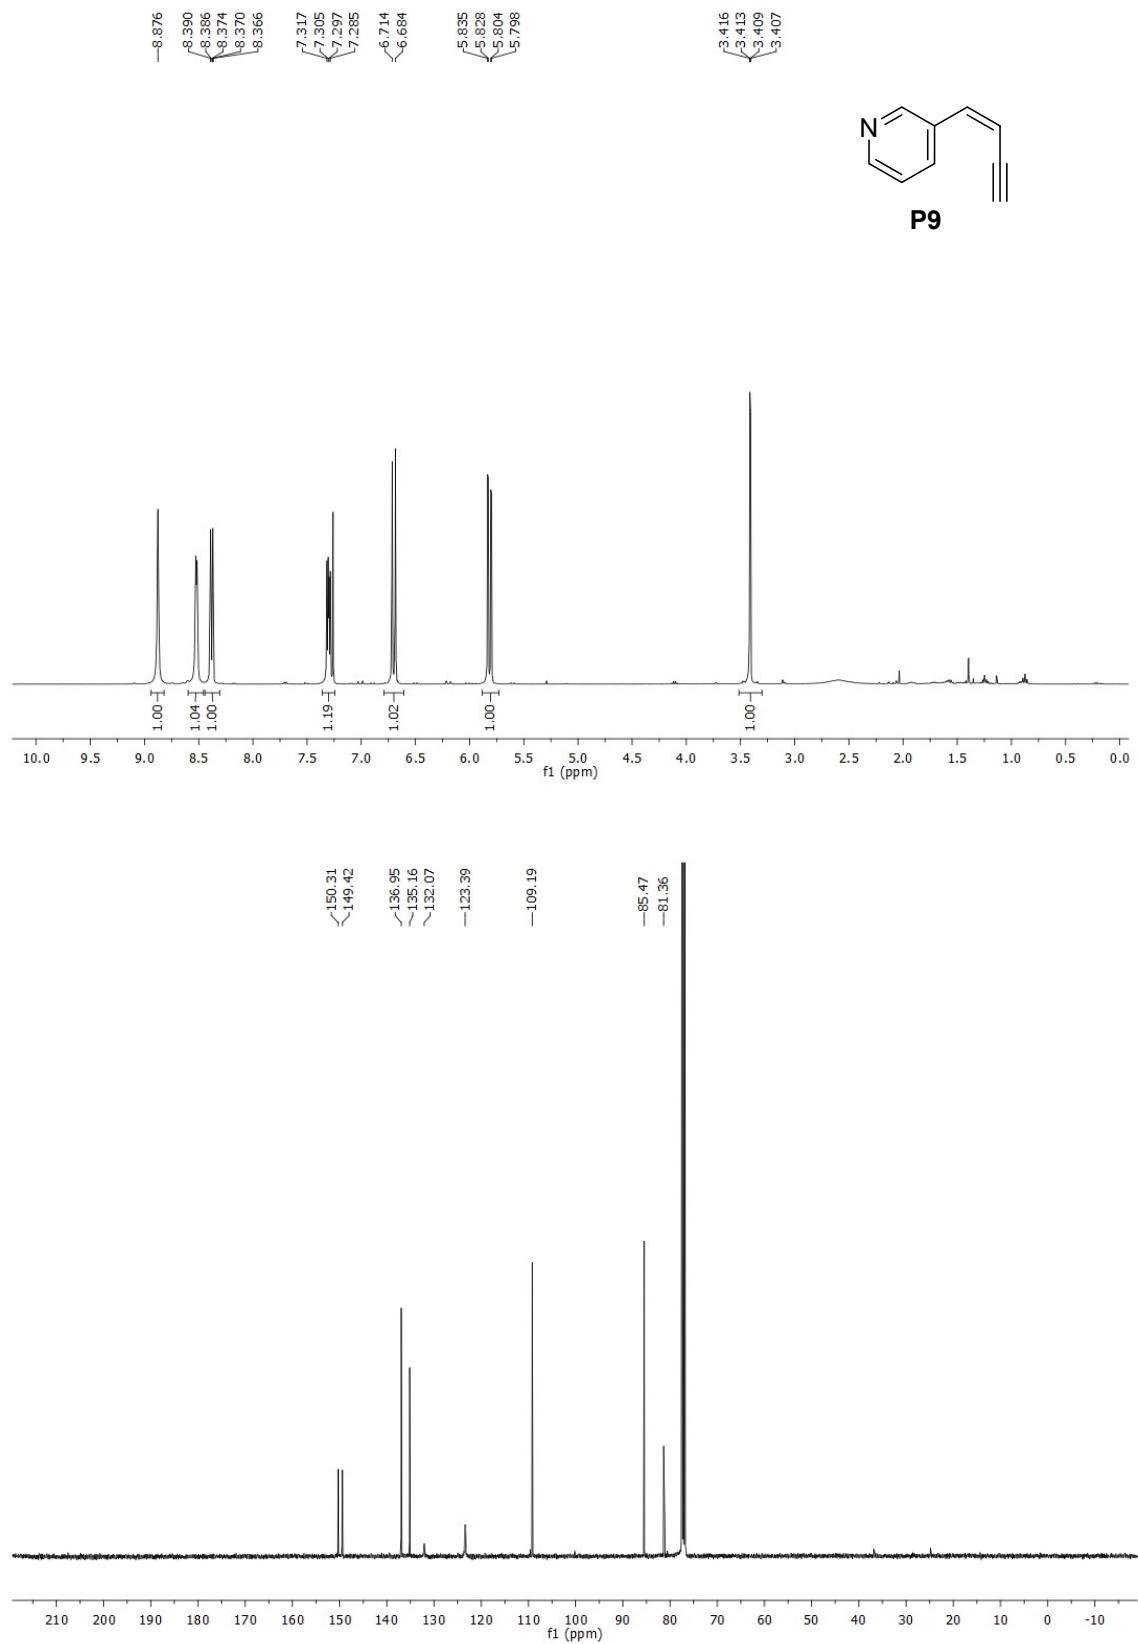

Figure S22. <sup>1</sup>H NMR and <sup>13</sup>C NMR spectra of compound **P9** in CDCl<sub>3</sub>.
